# Supplementary material for: Nature’s Palette: Characterization of Shared Pigments in Colorful Avian and Mollusk Shells
Source: PubMed Central journal article supplement (PMC4674117; doi:10.1371/journal.pone.0143545), 2015-12-09

**S2 Figure. UHPLC/MS chromatograms for pigment extracts from all avian eggshells and molluscan shells included in the study.**

**Japanese Quail (at 583)**

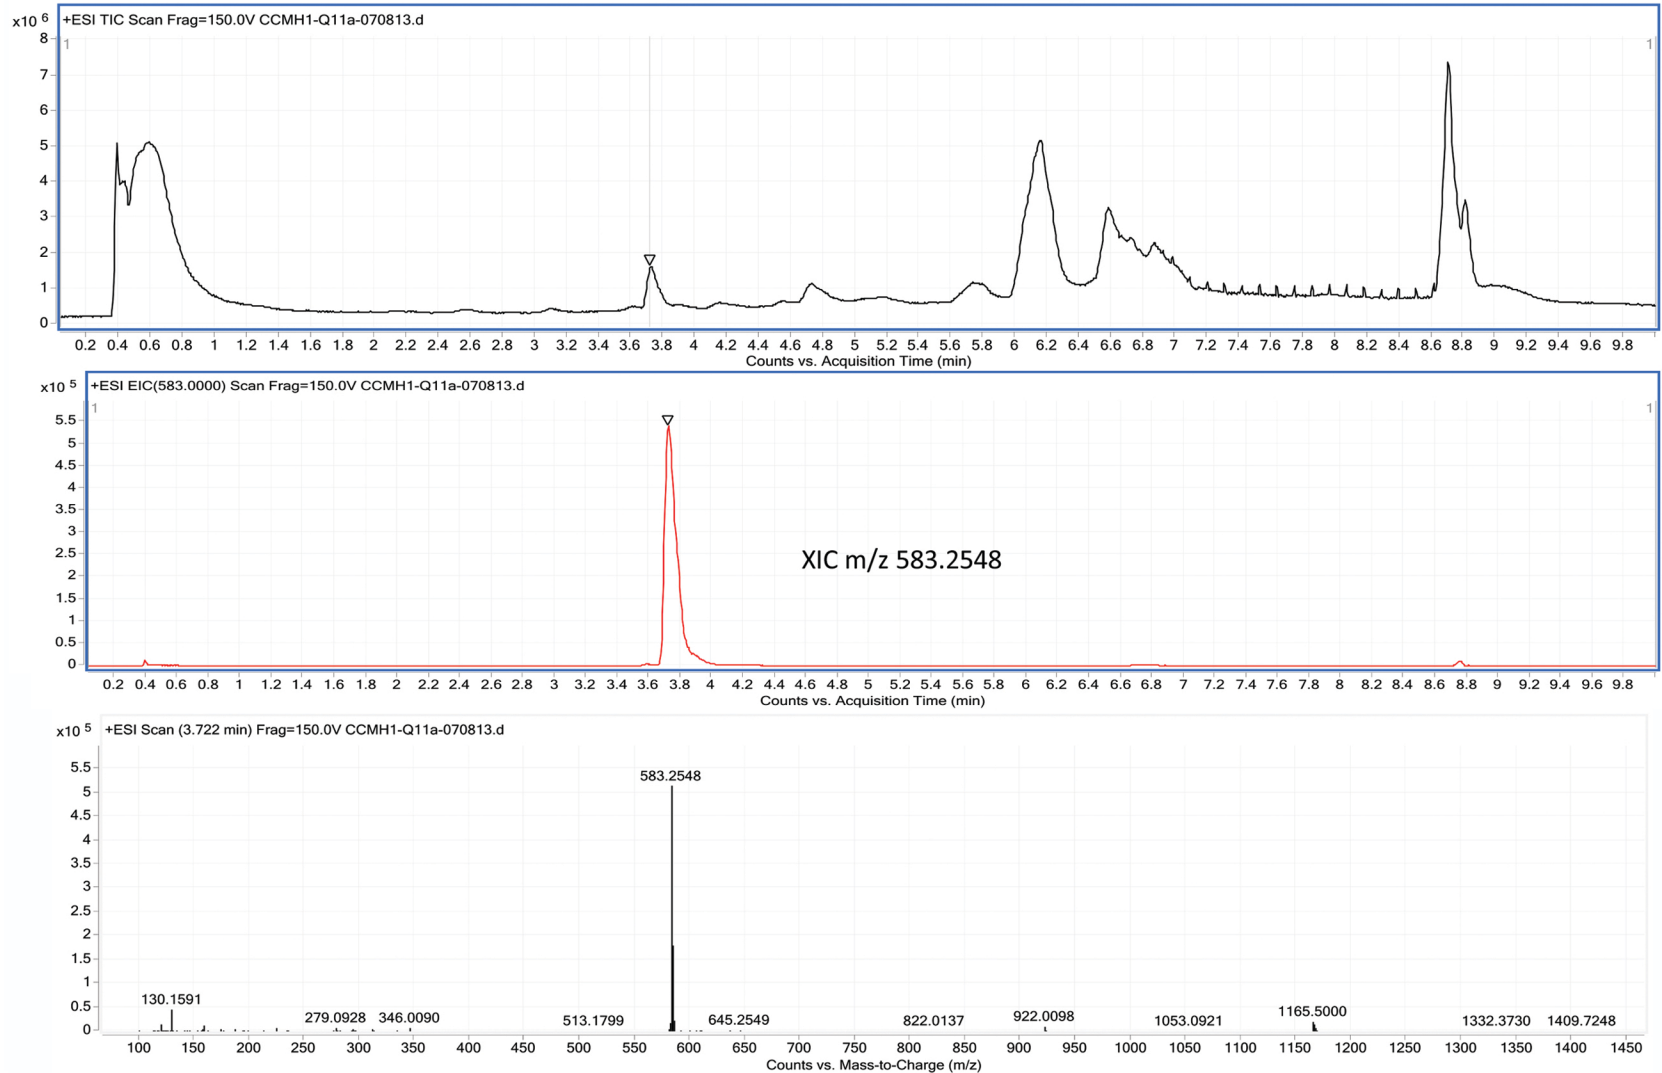

### ESM\_1 UHPLC/MS chromatograms of all taxa included in the analysis

#### Japanese Quail (at 583)

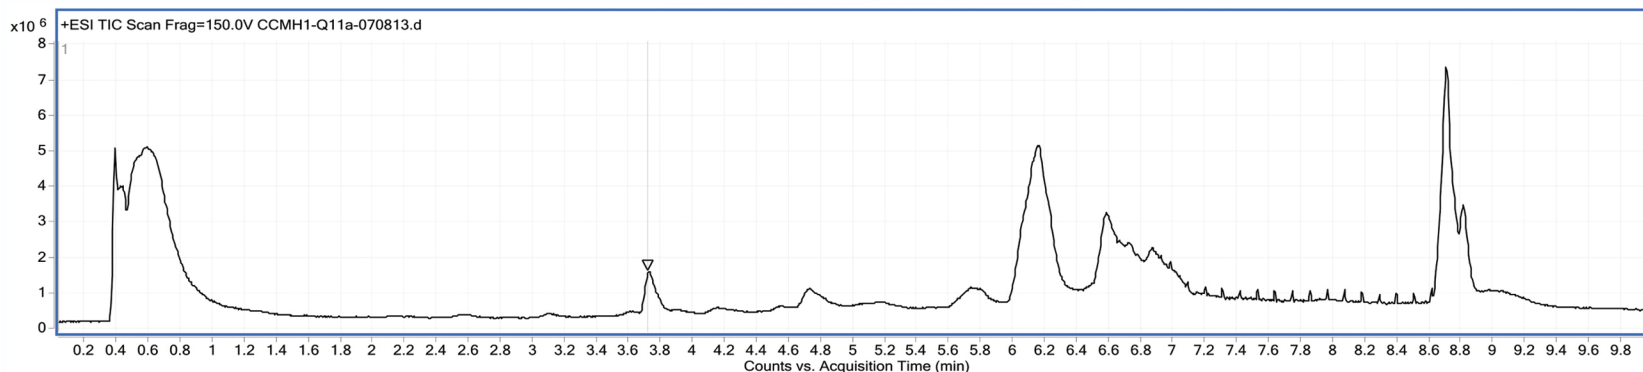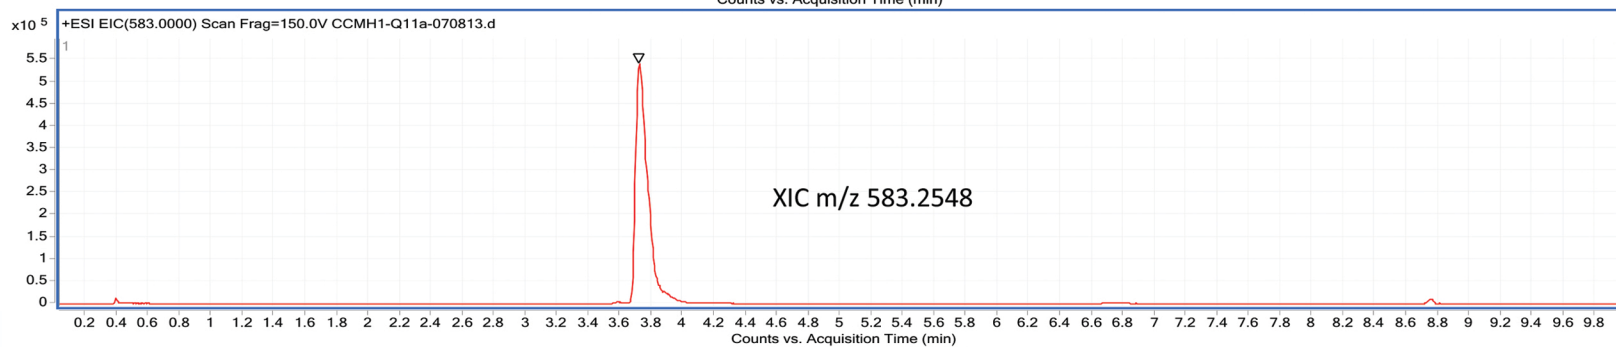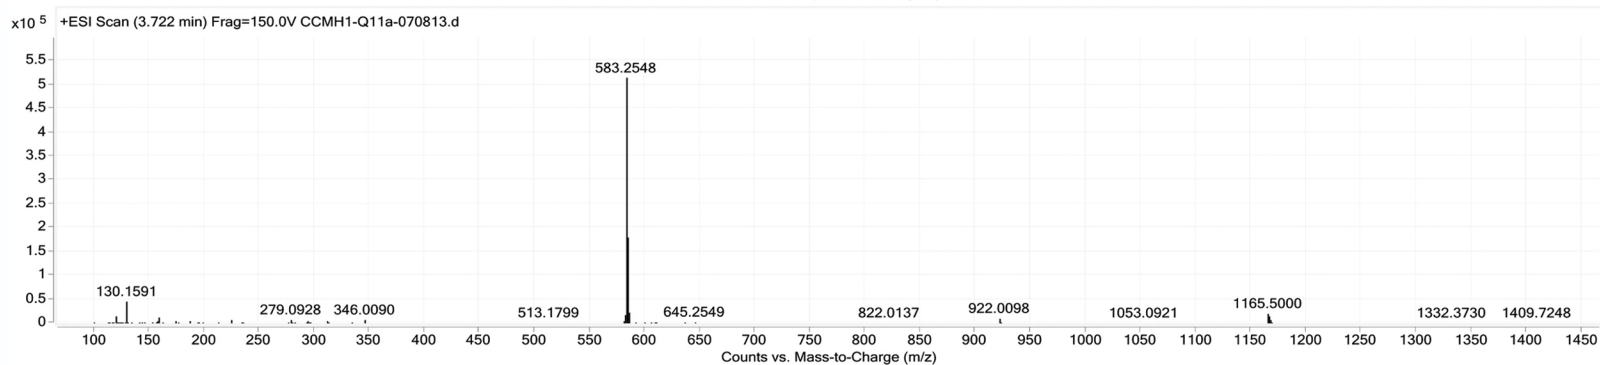

# Japanese quail (at 563)

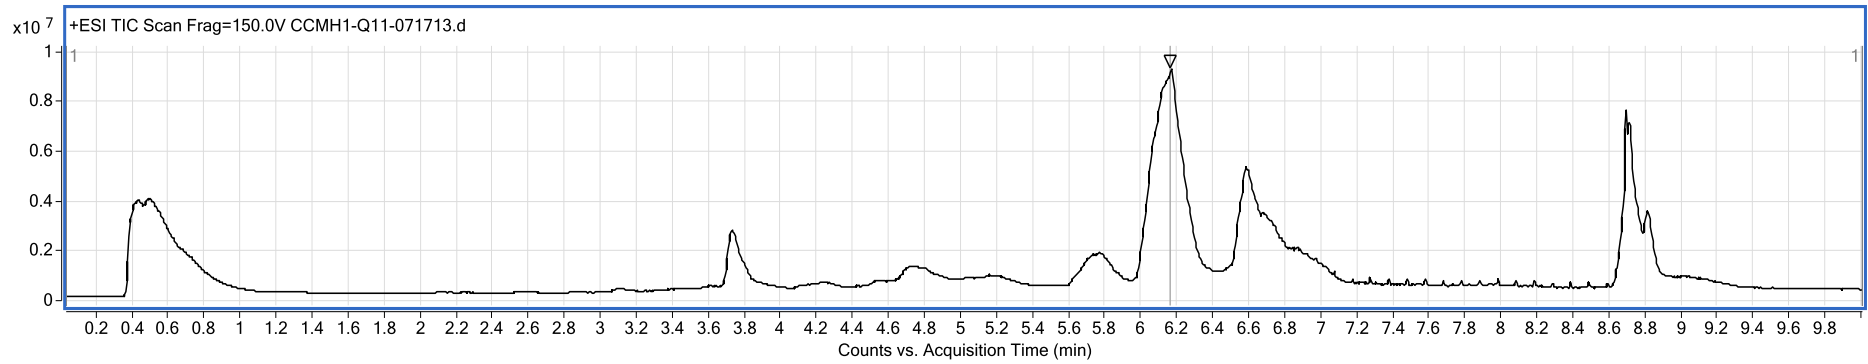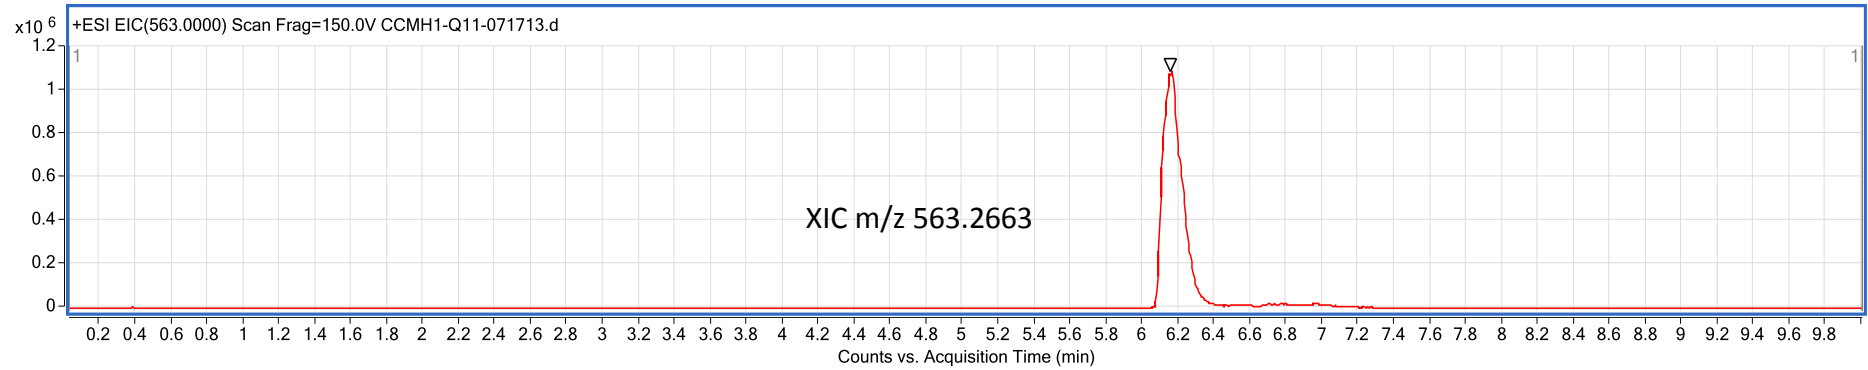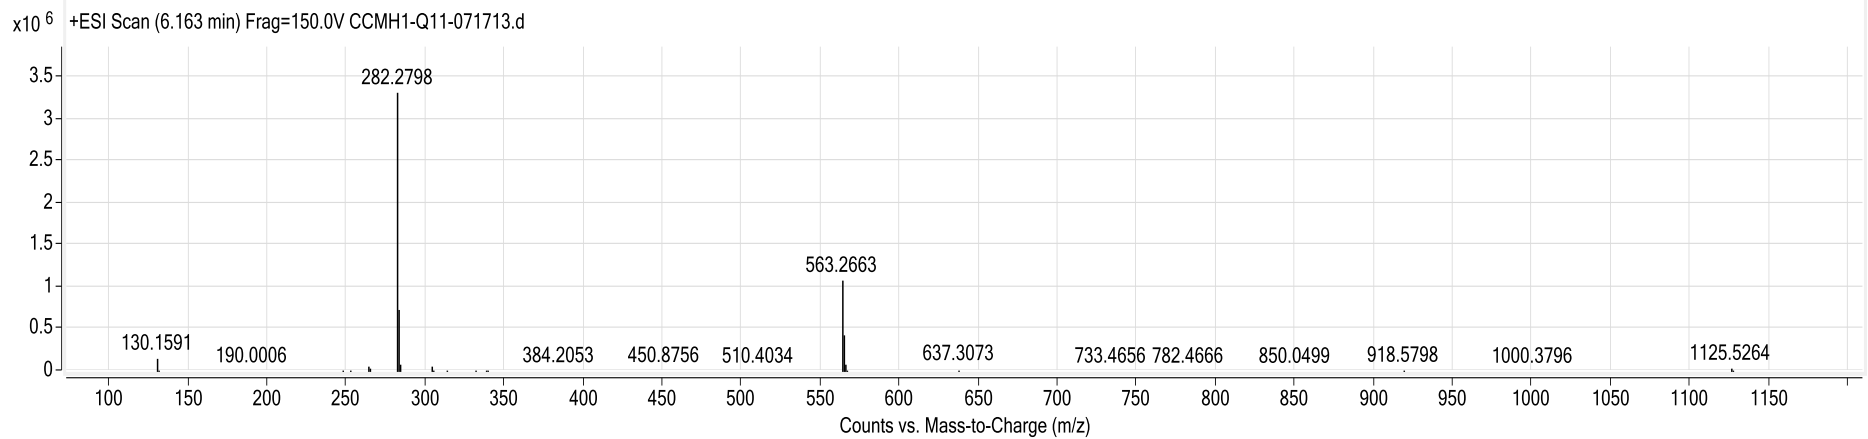

# Domesticated chicken (at 563)

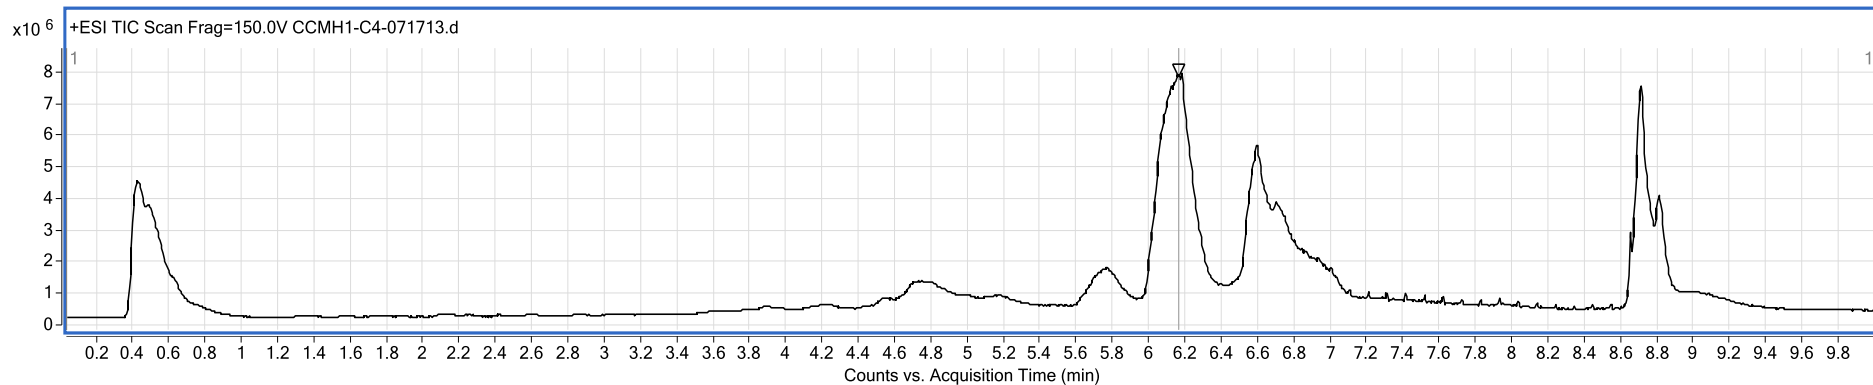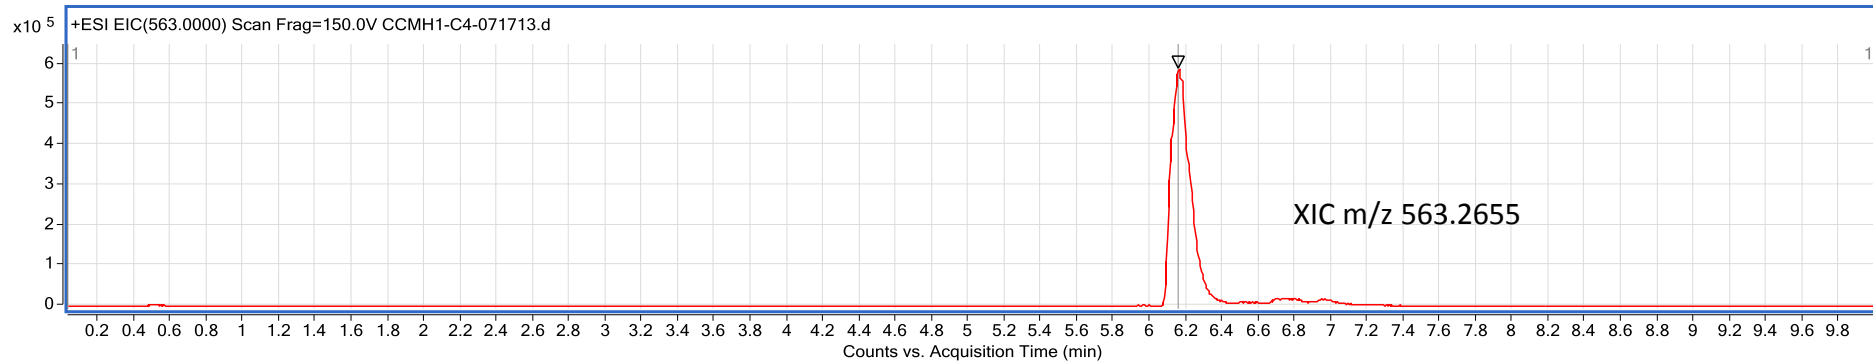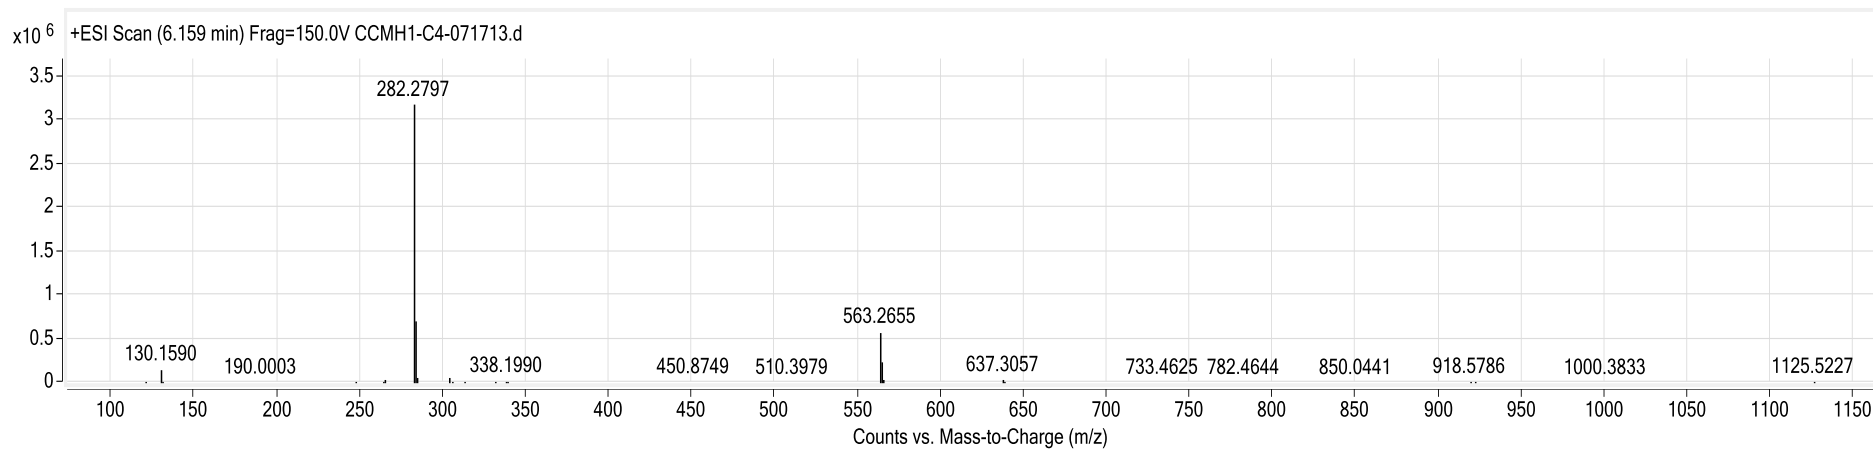

# Brown-headed cowbird (at 563)

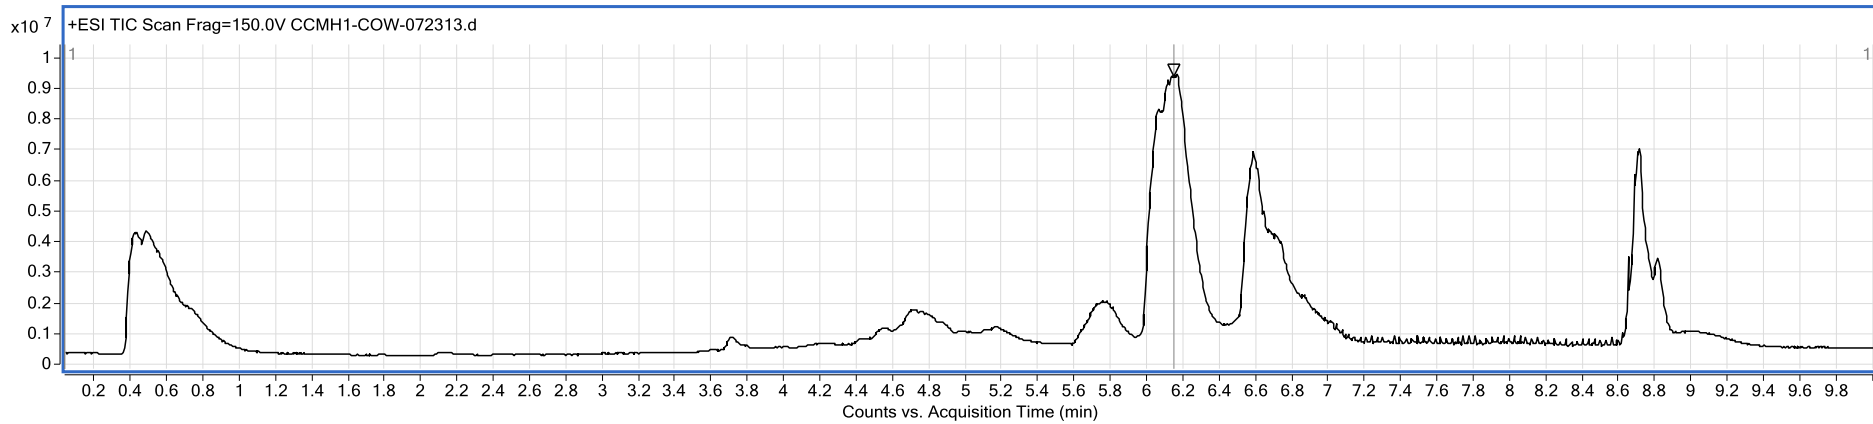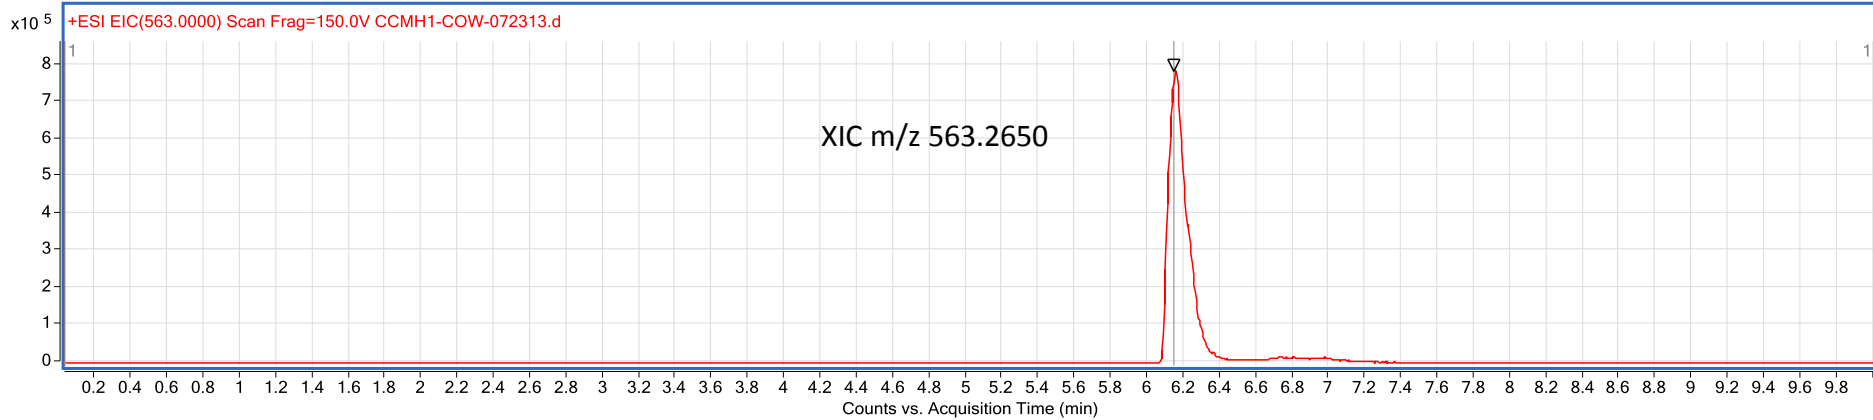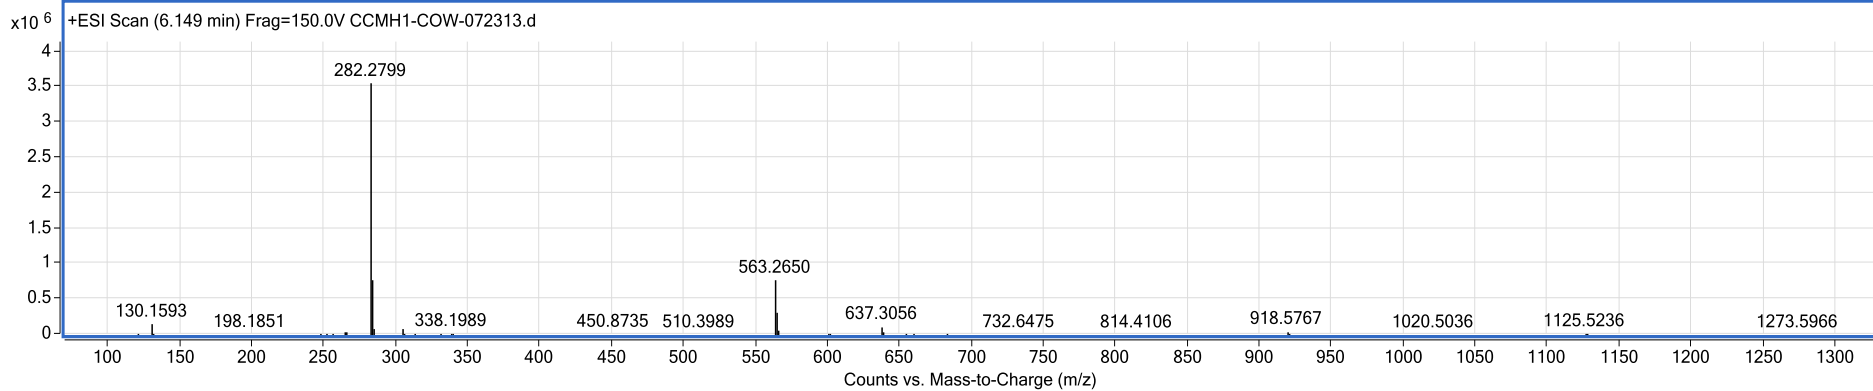

# Brown-headed cowbird (at 583)

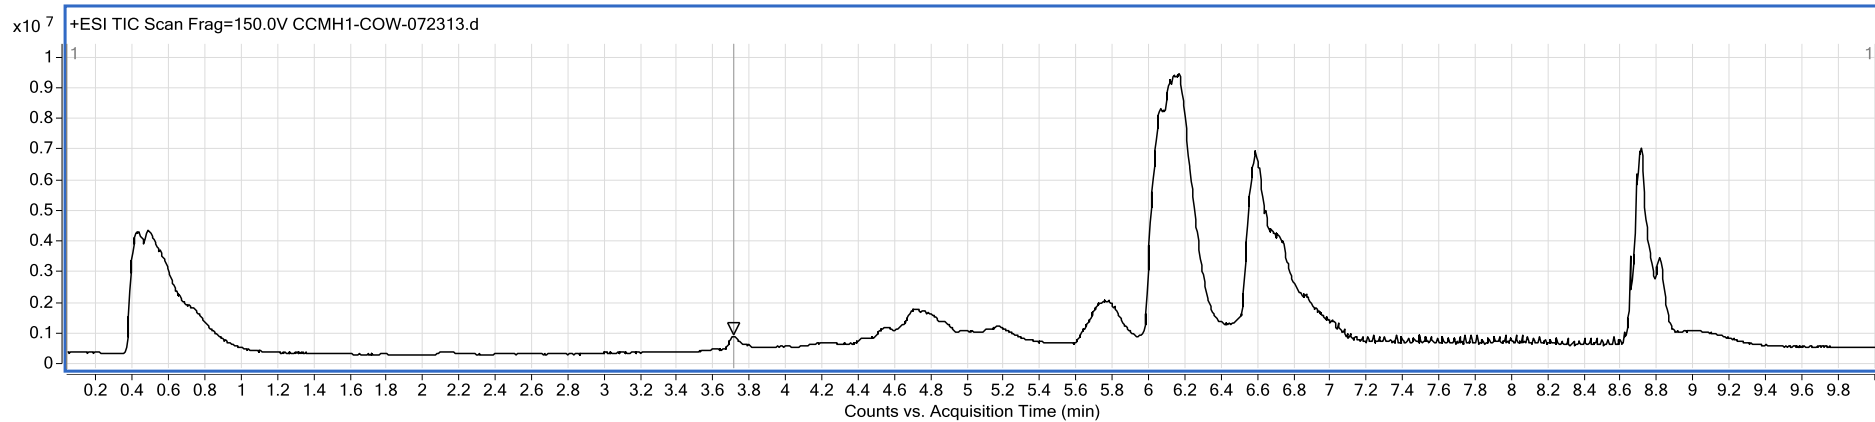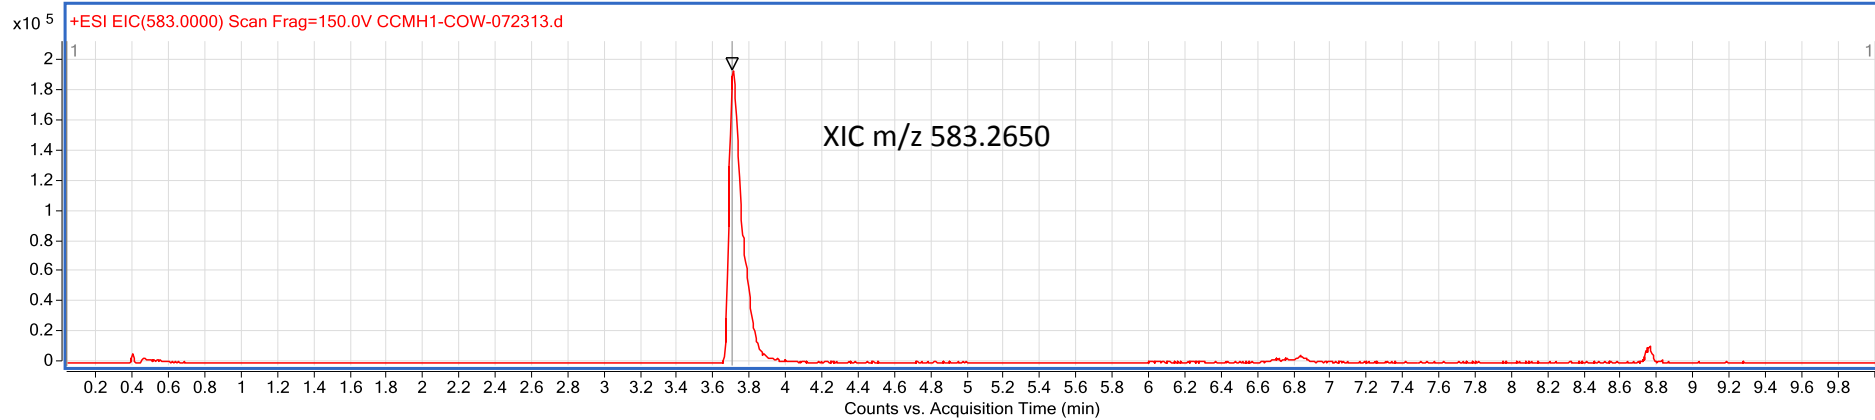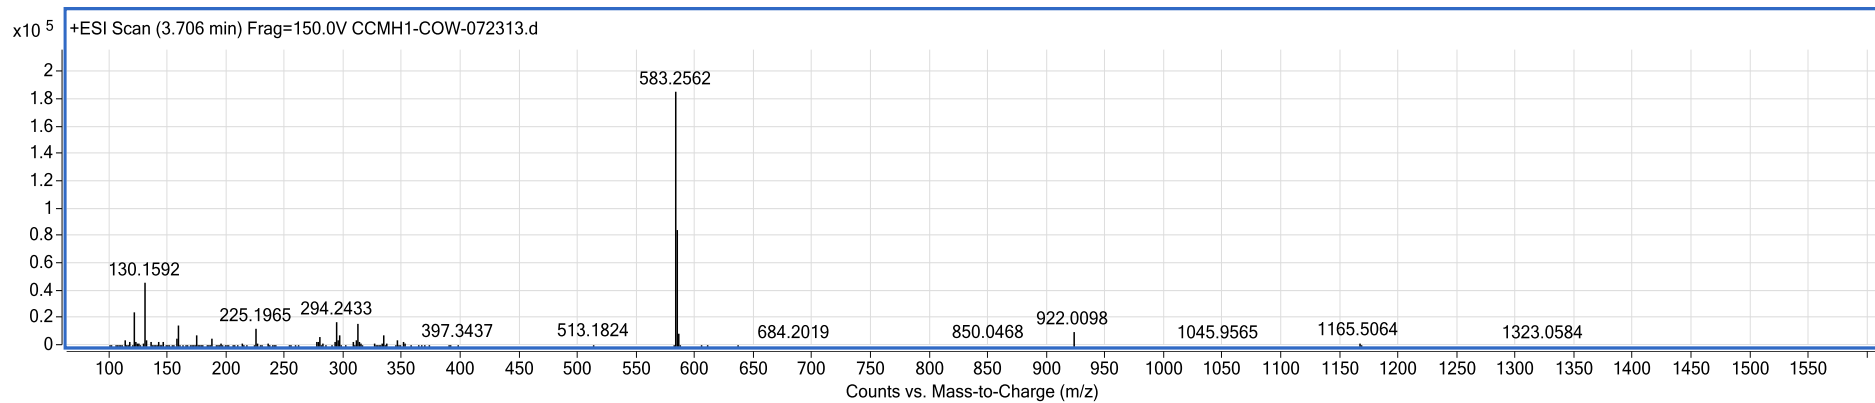

# American Robin (at 583)

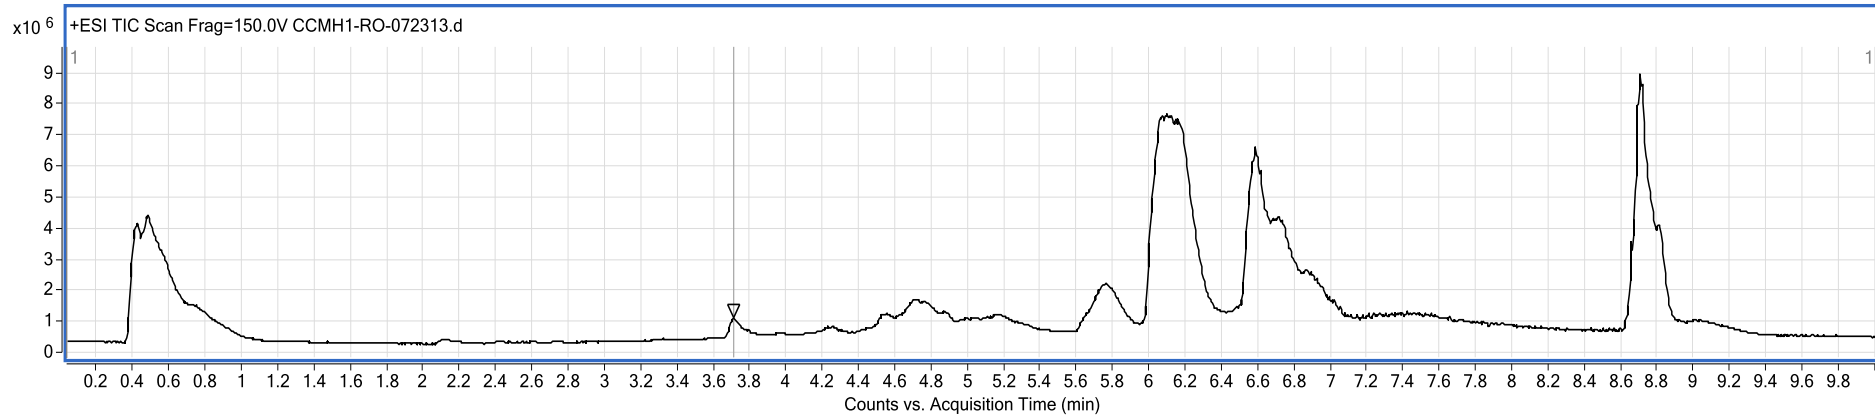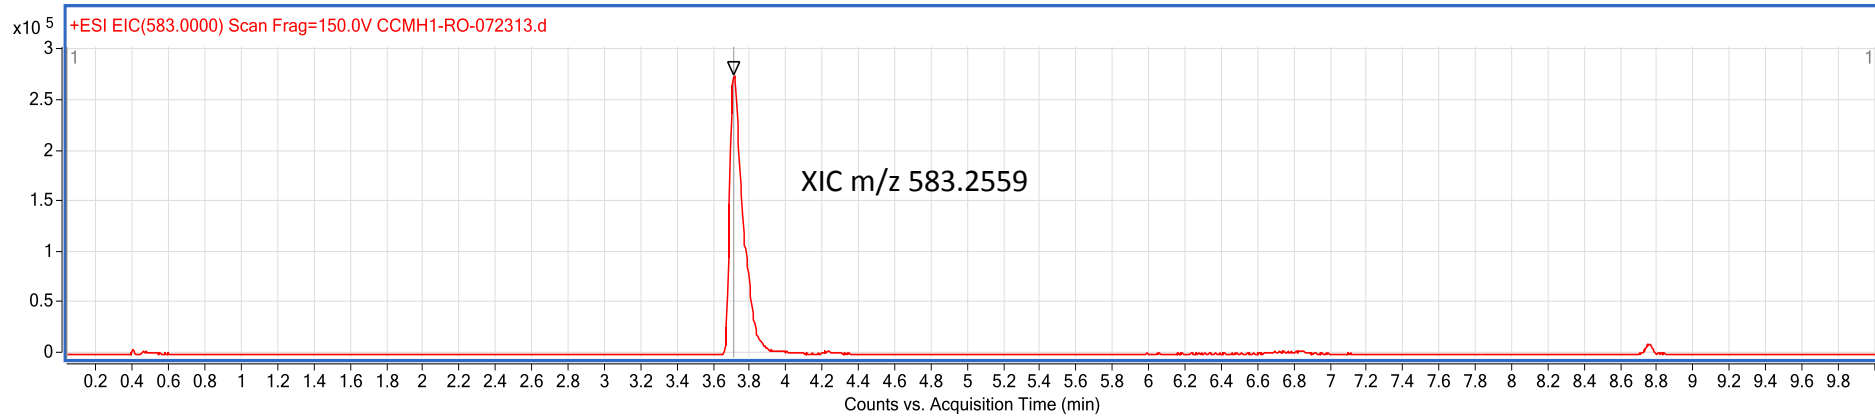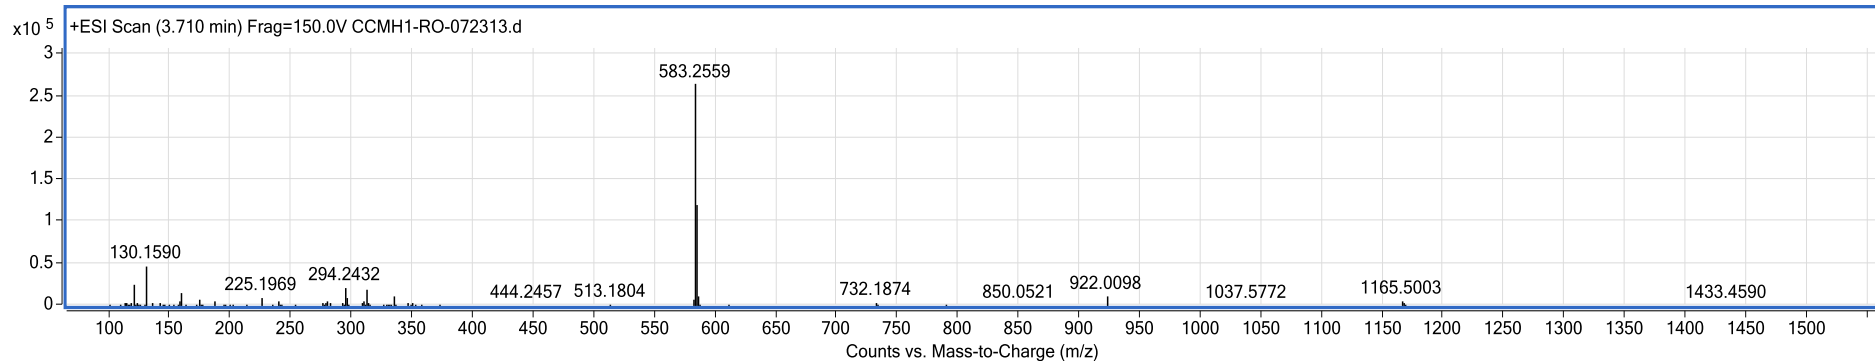

# American robin (at 563)

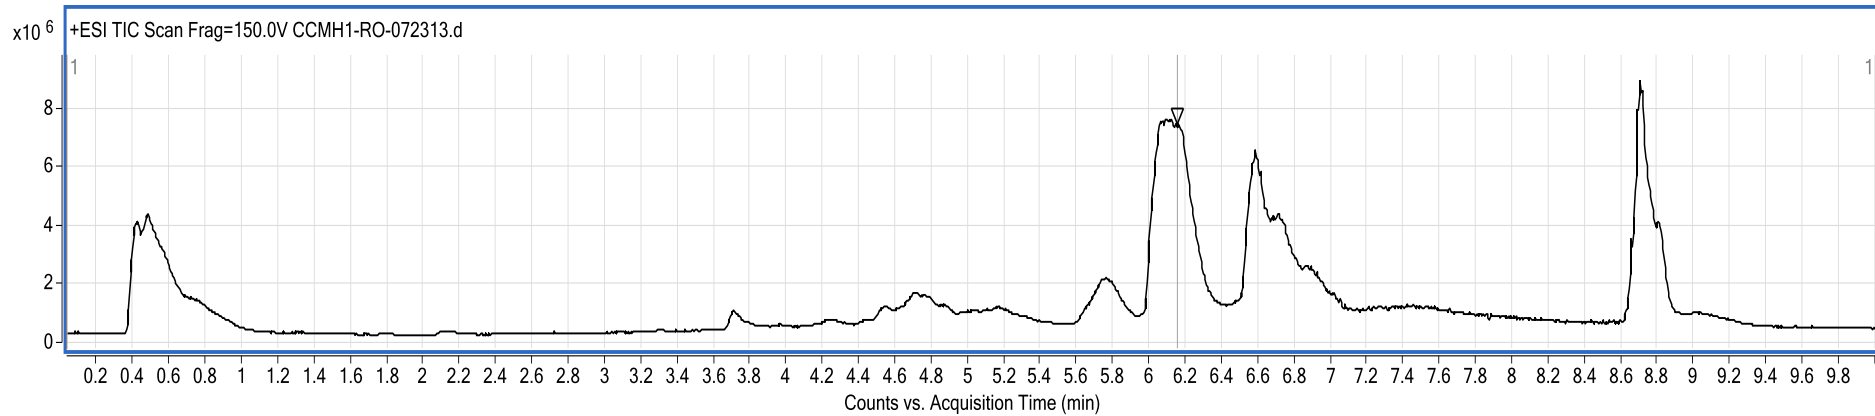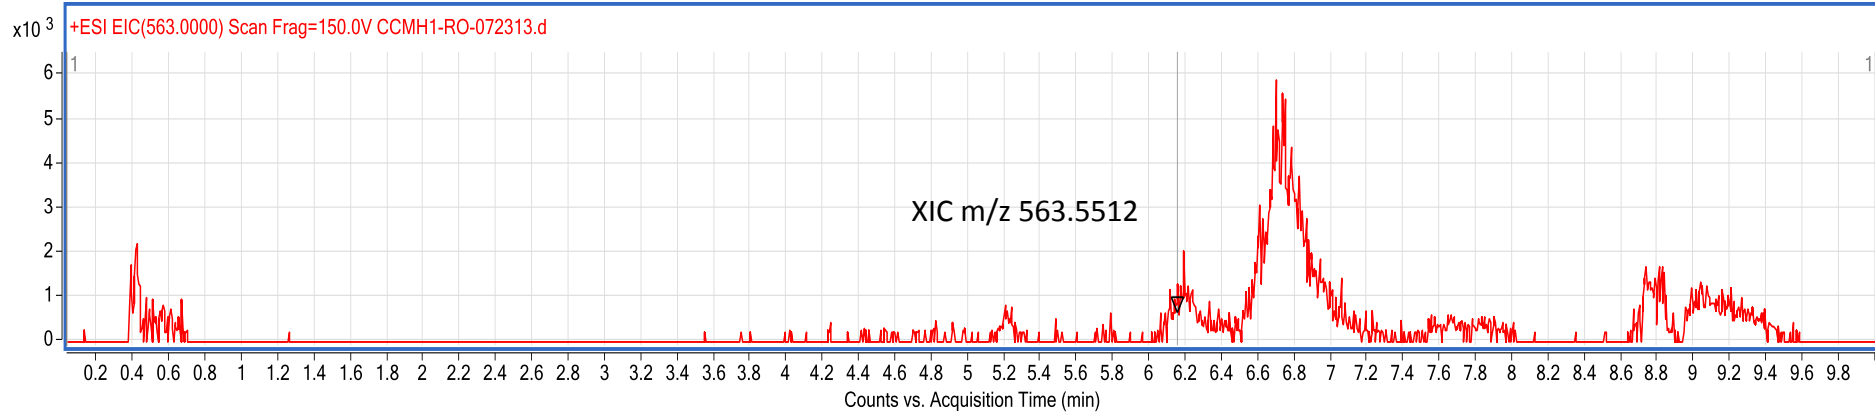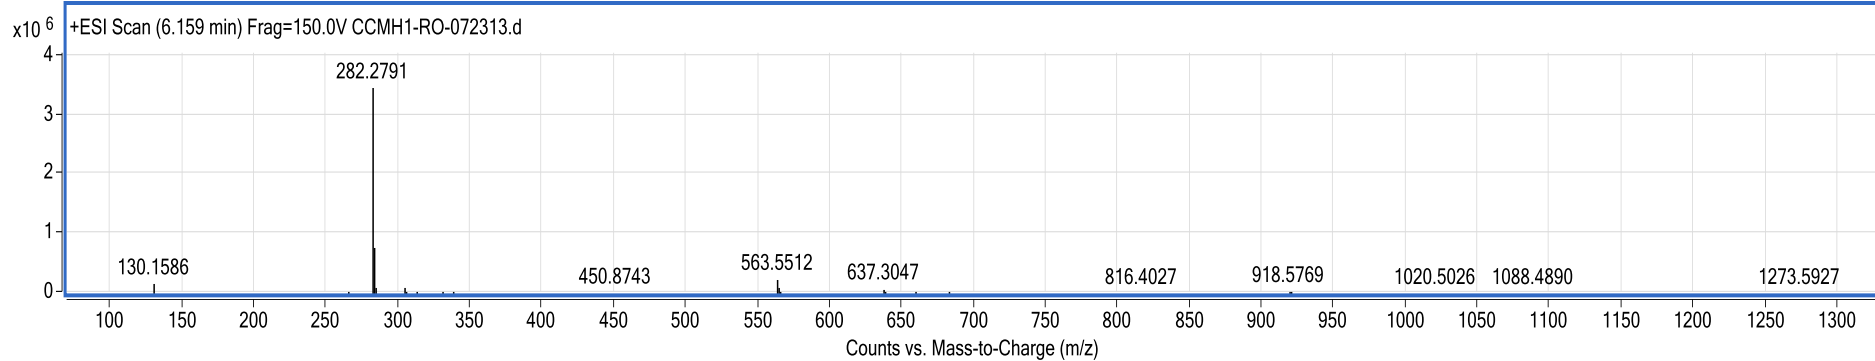



# American alligator (at 563)

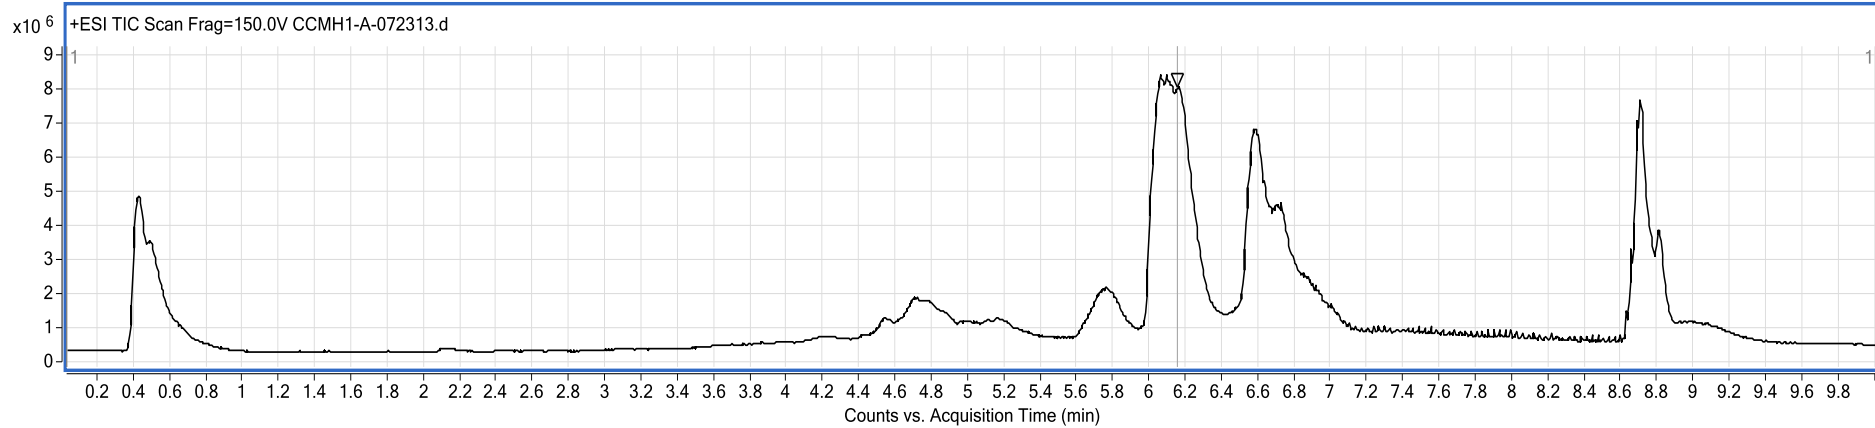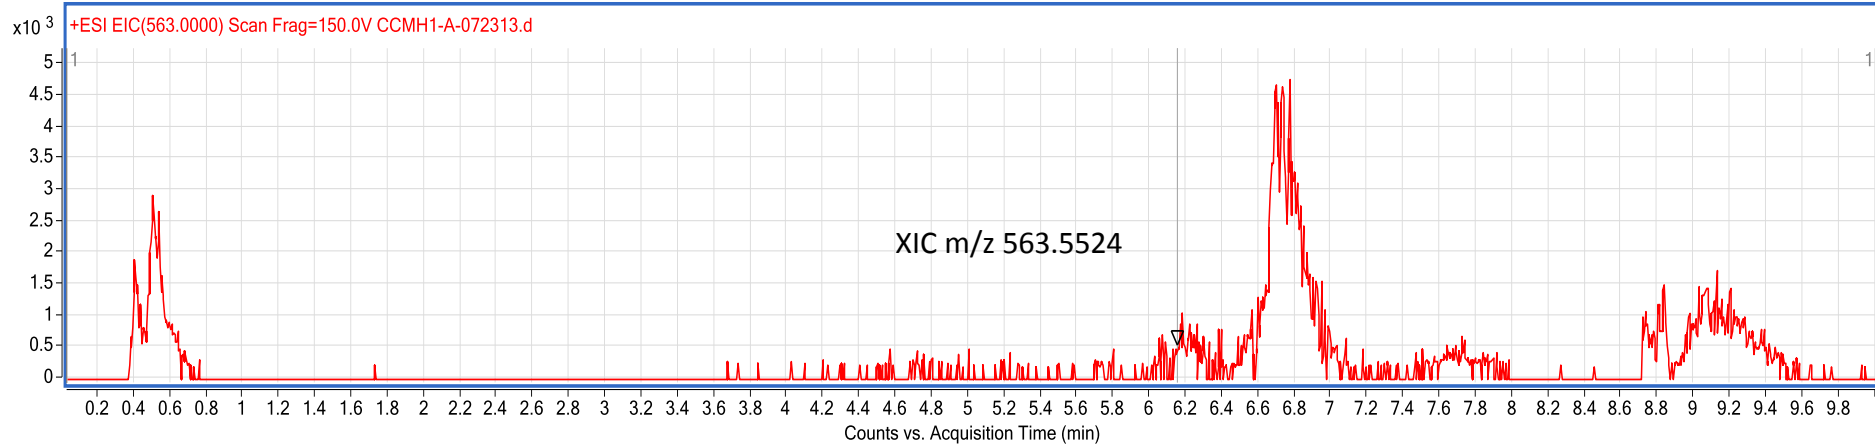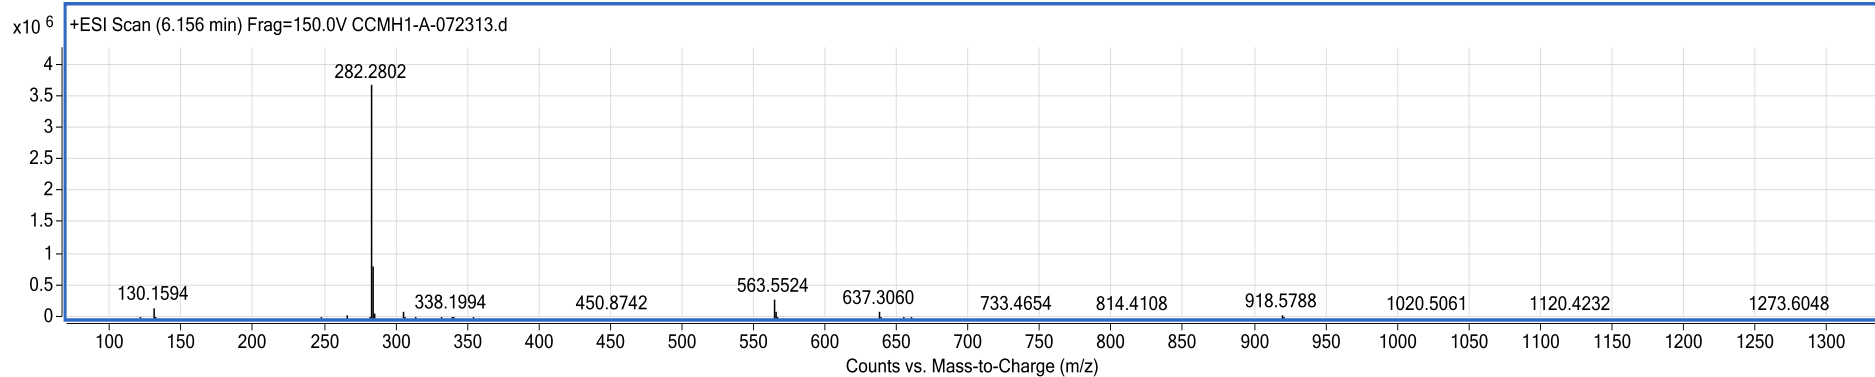

# Emu (at 583)

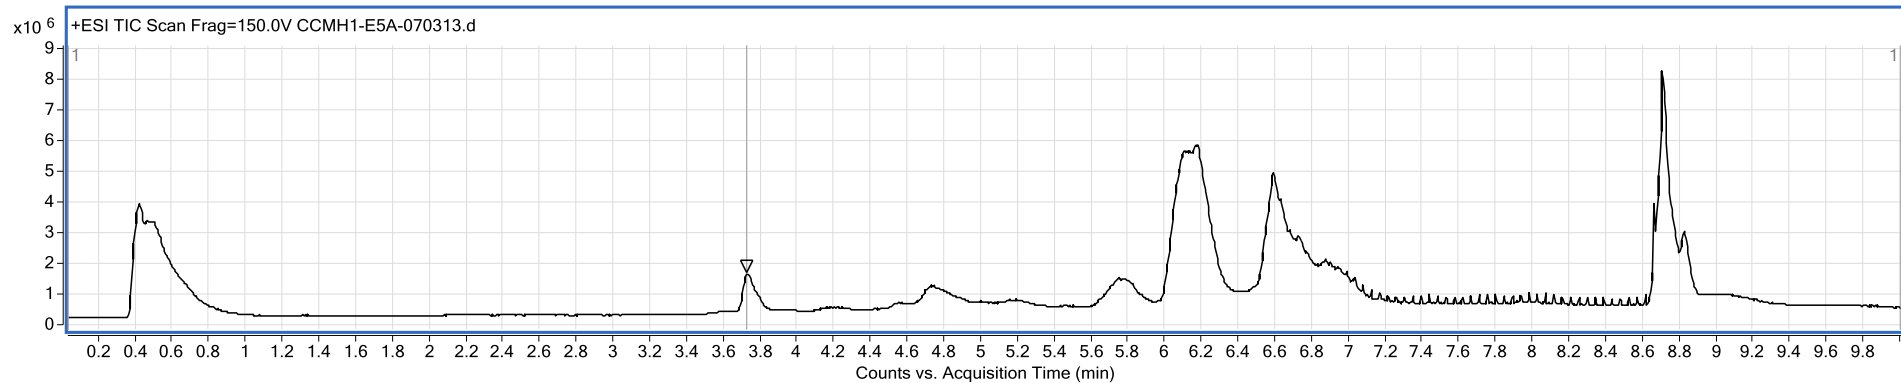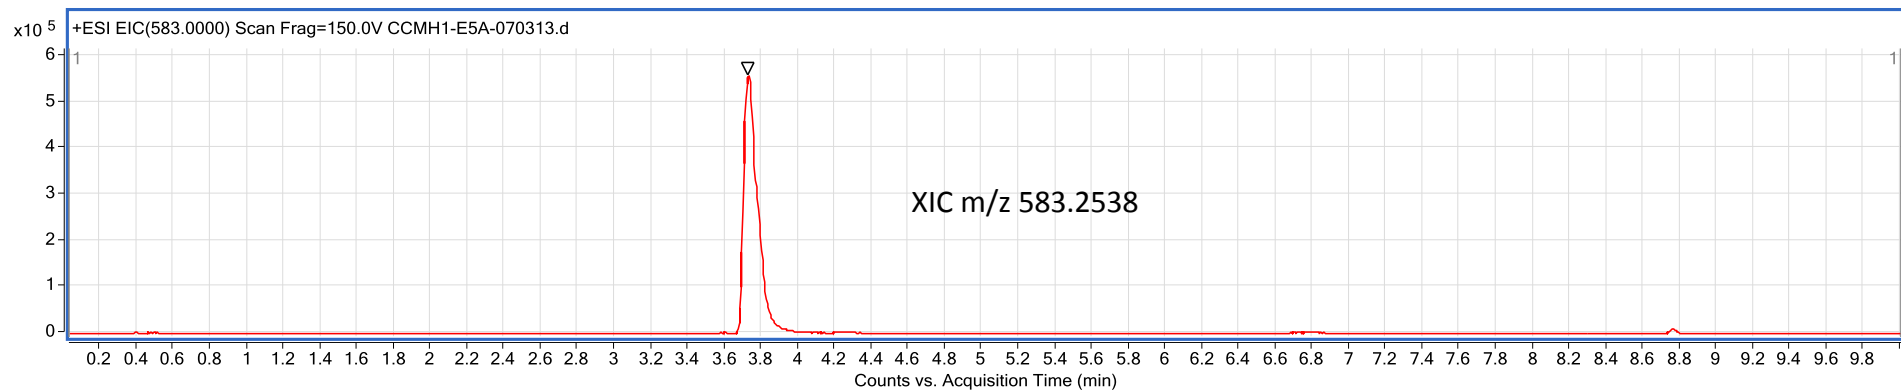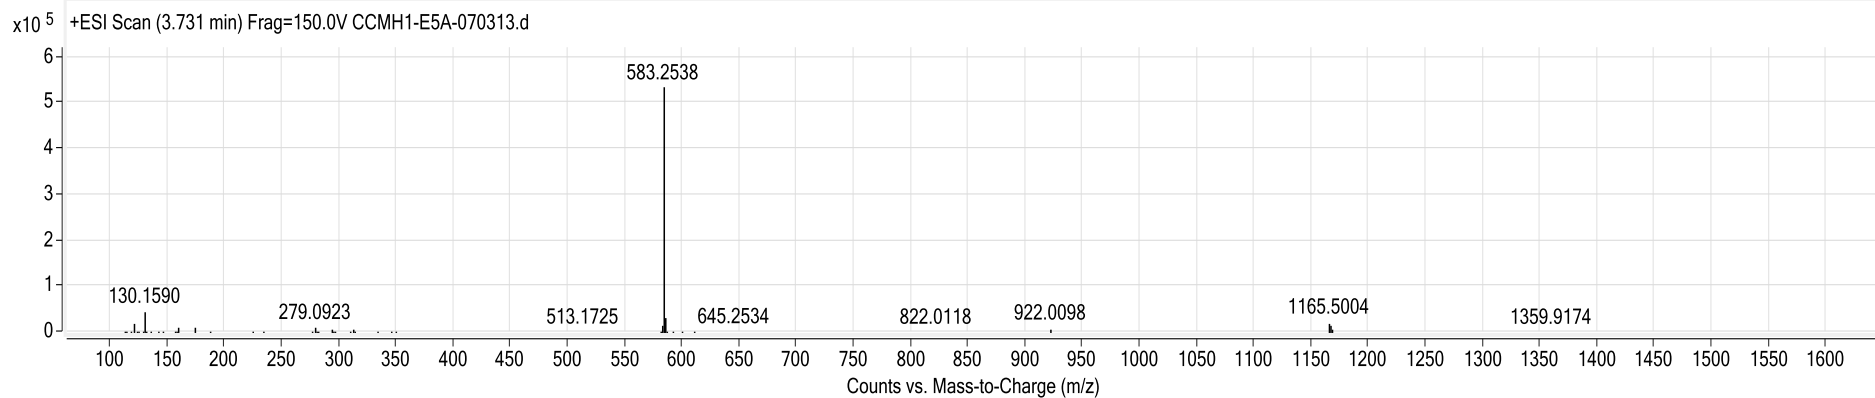

# Ostrich (at 563)

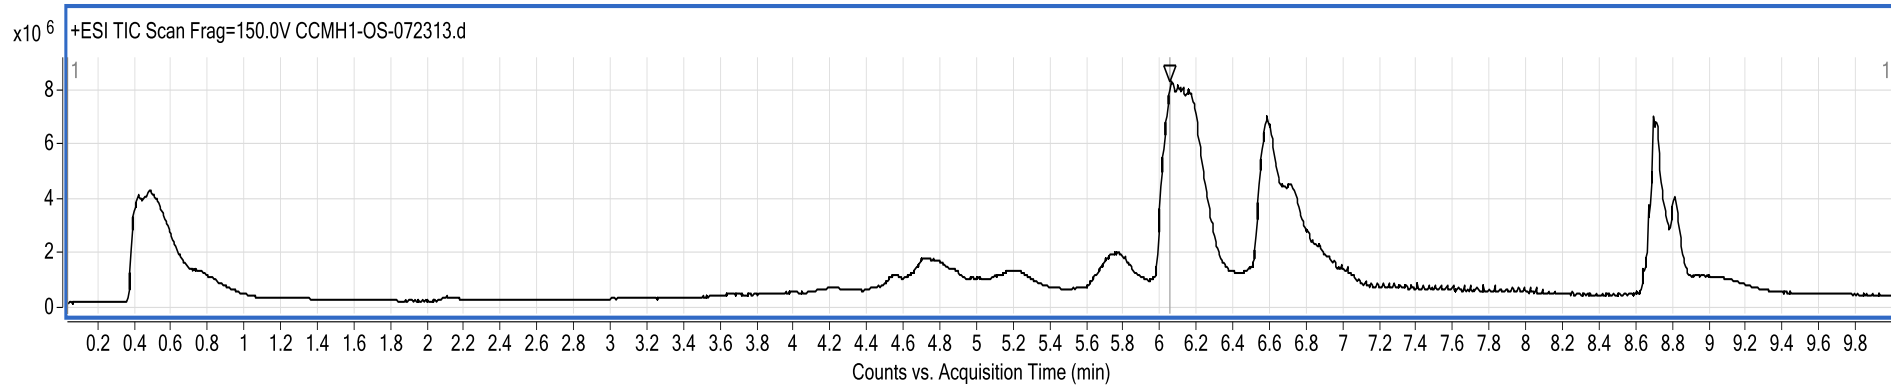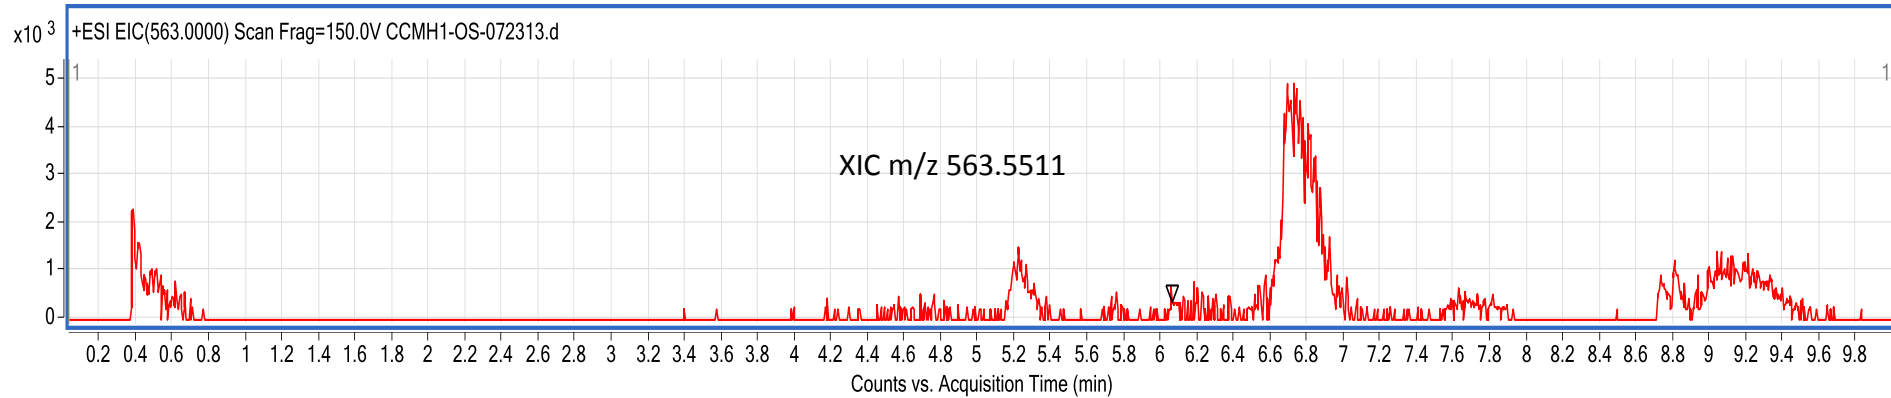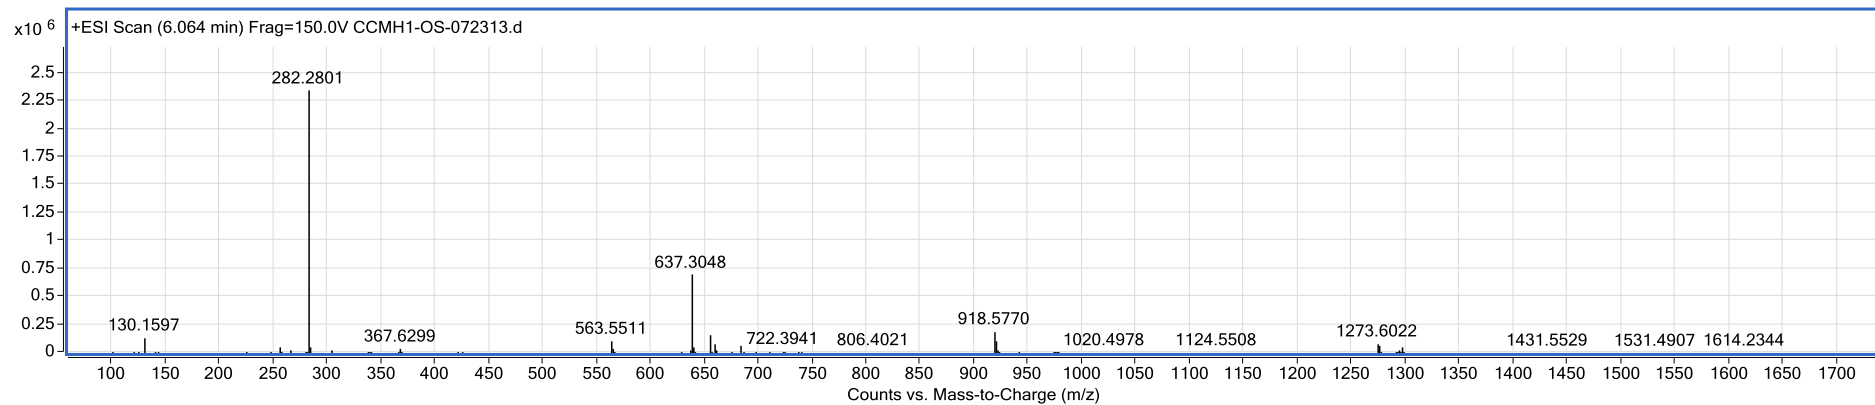

# Southern cassowary (at 583)

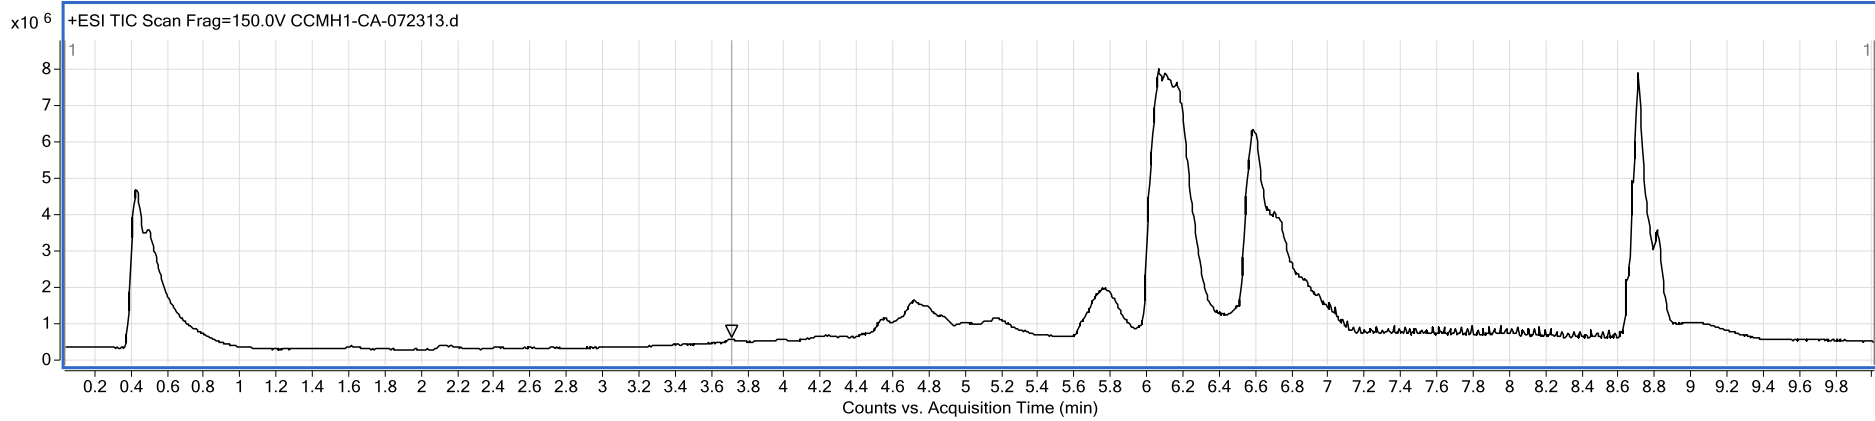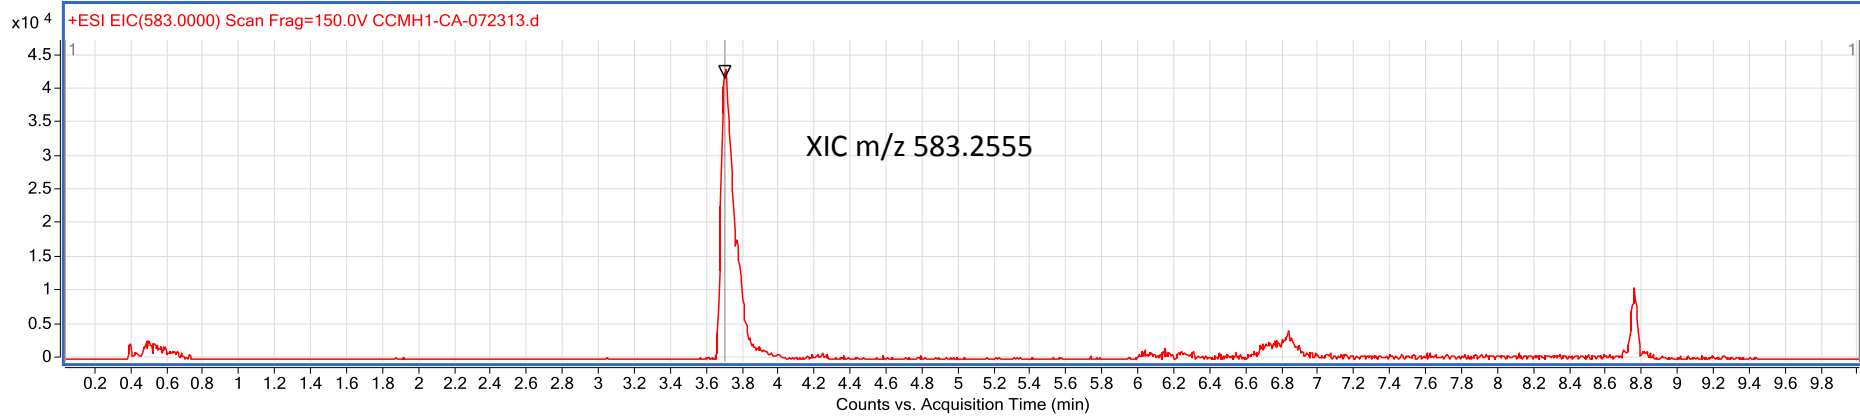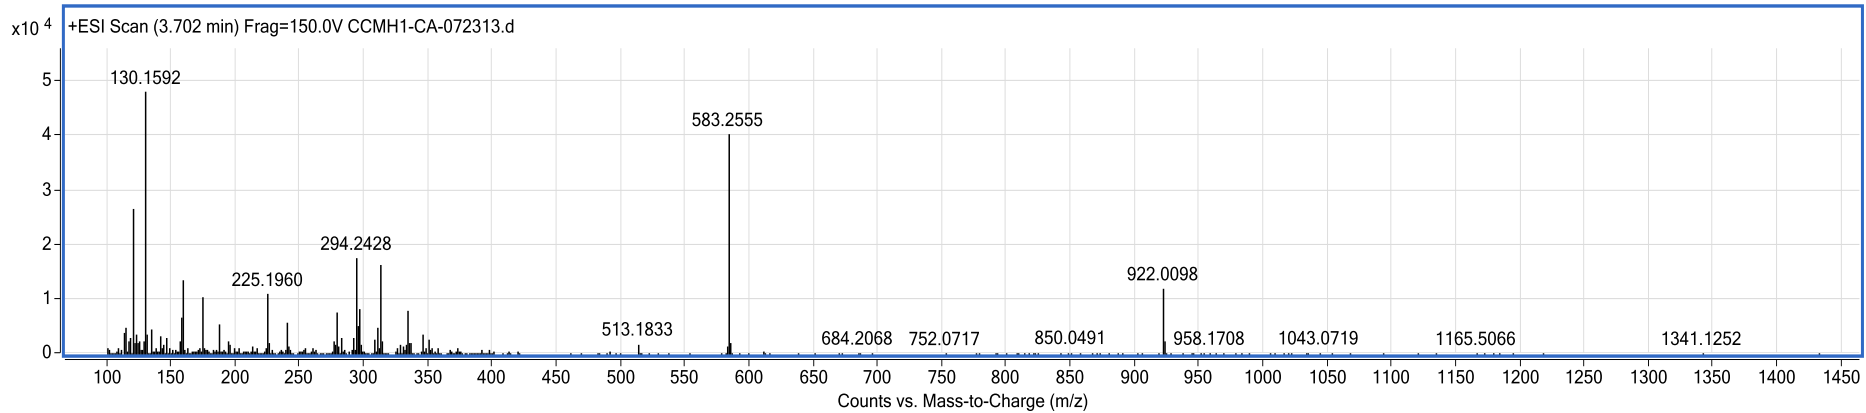

# Southern cassowary (at 563)

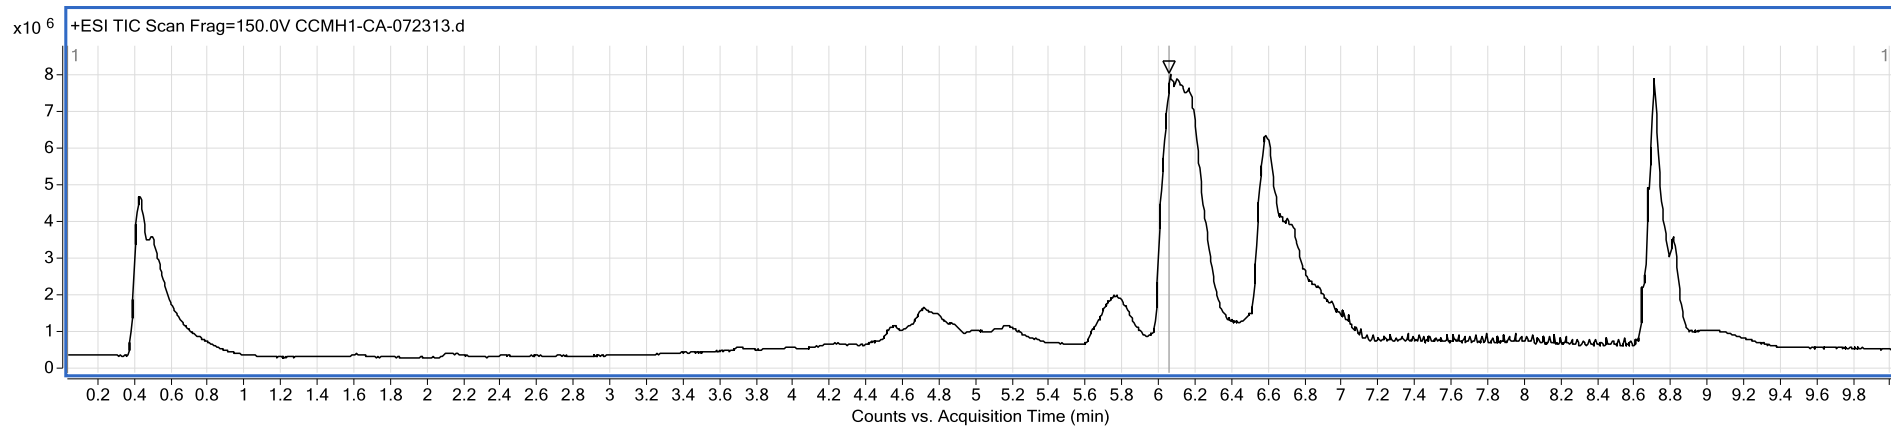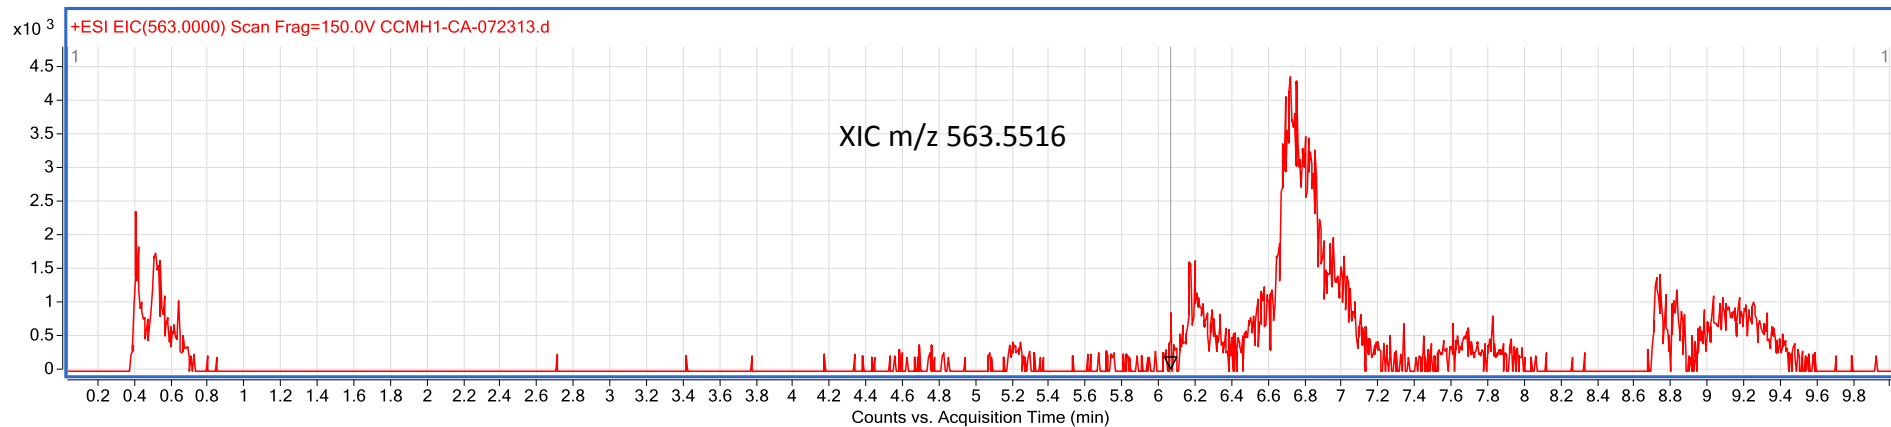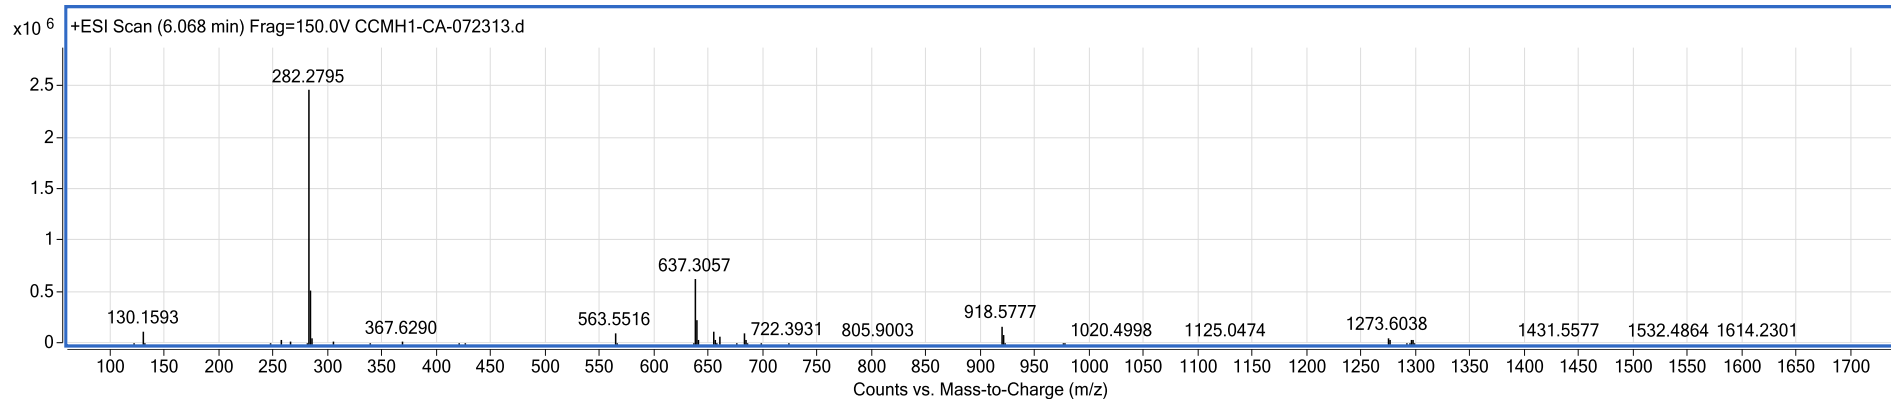

# Elephant bird (at 563)

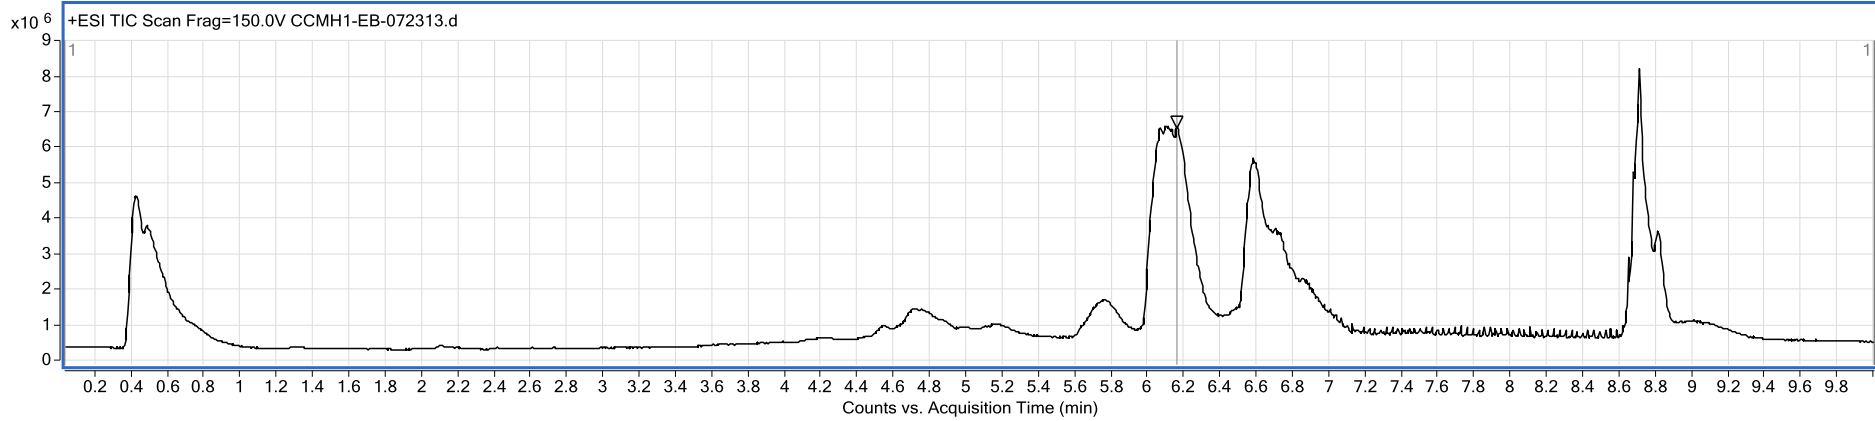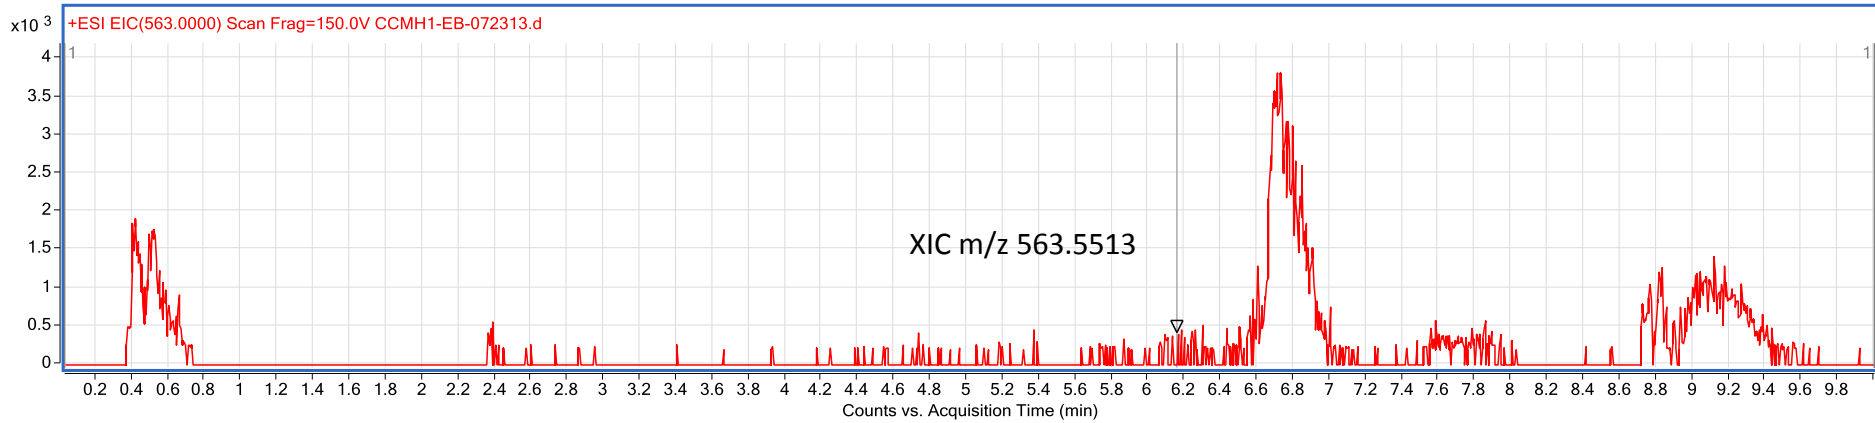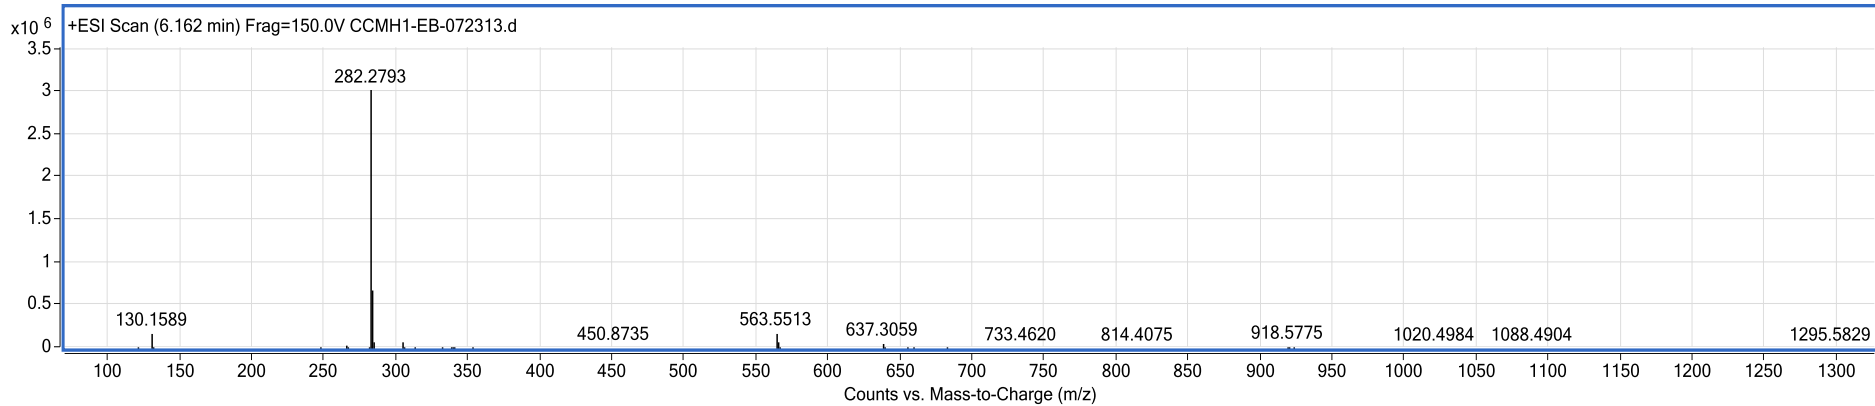

# North Island brown kiwi (at 563)

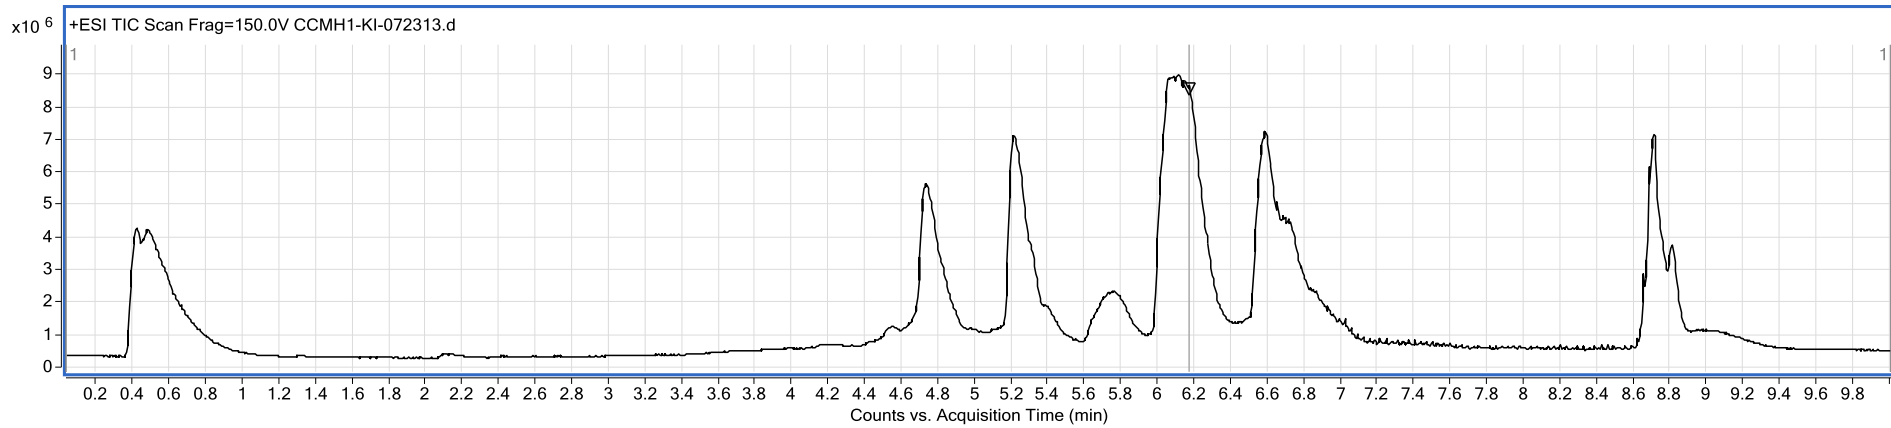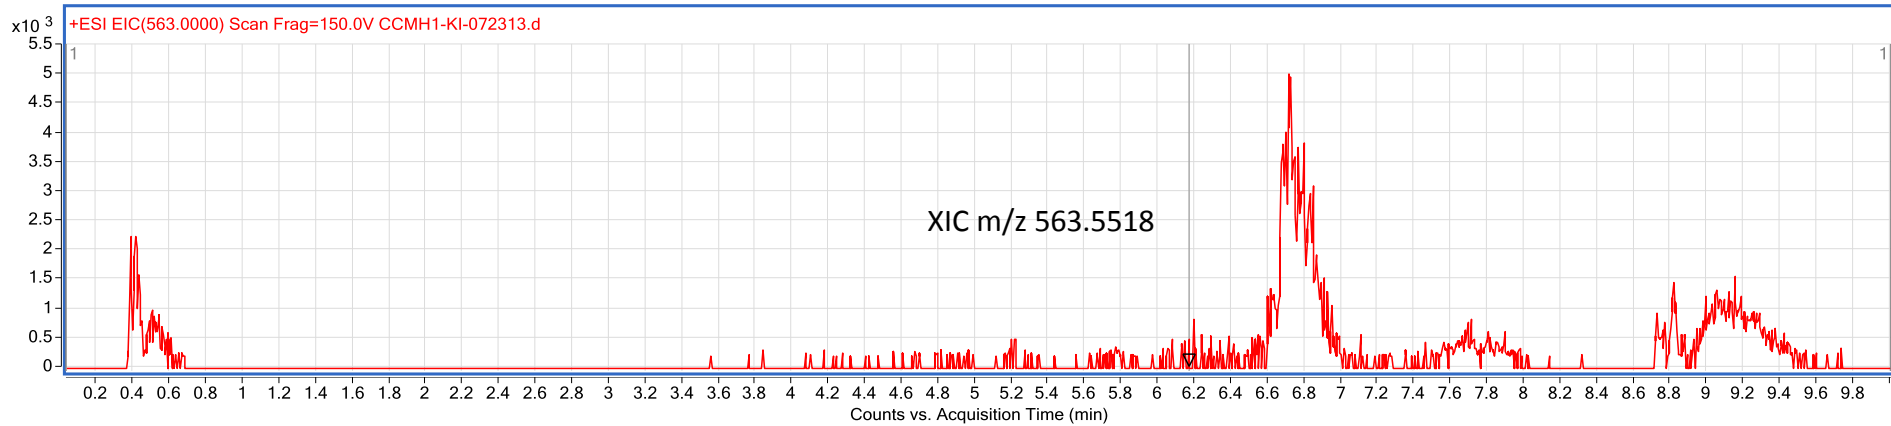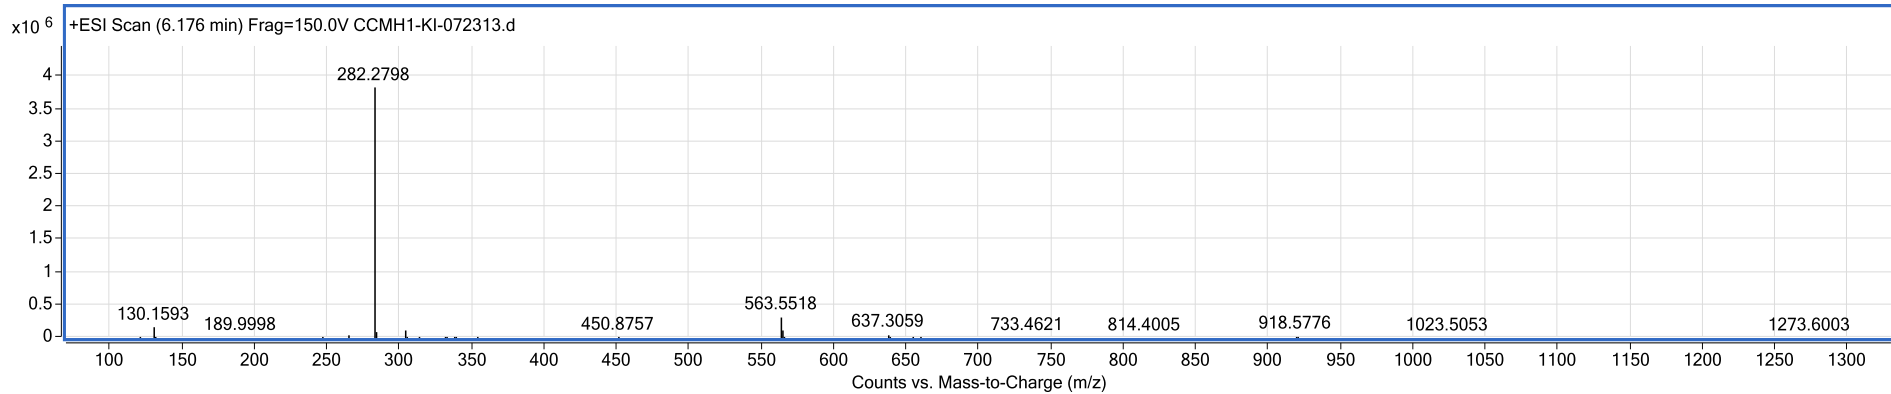

# Moa (at 563)

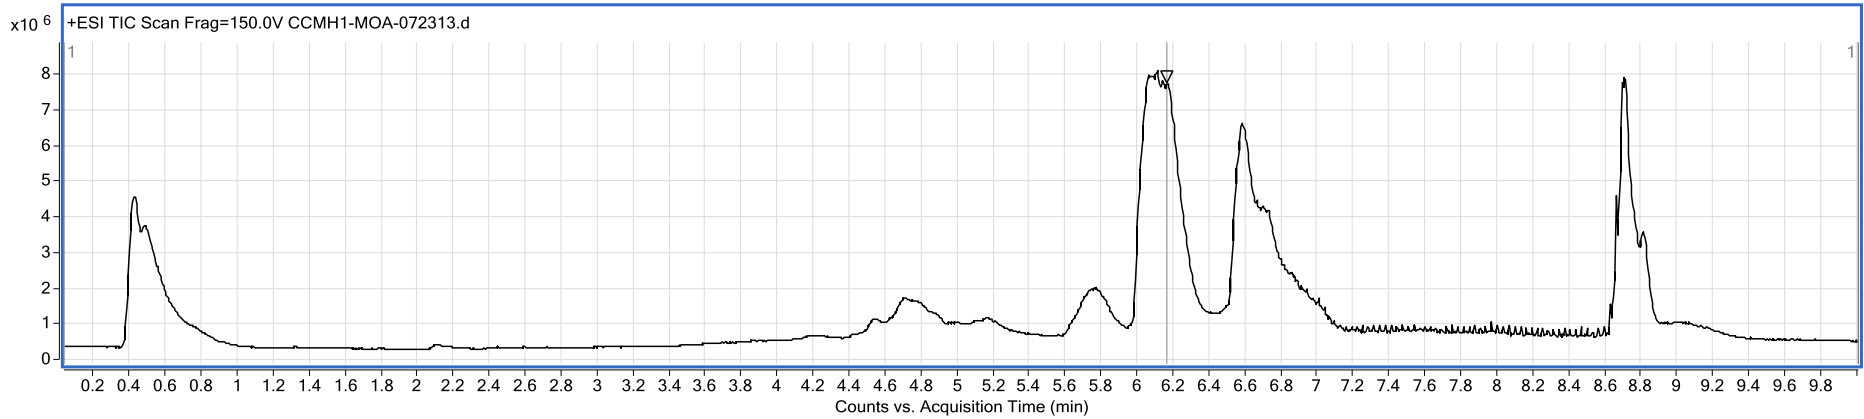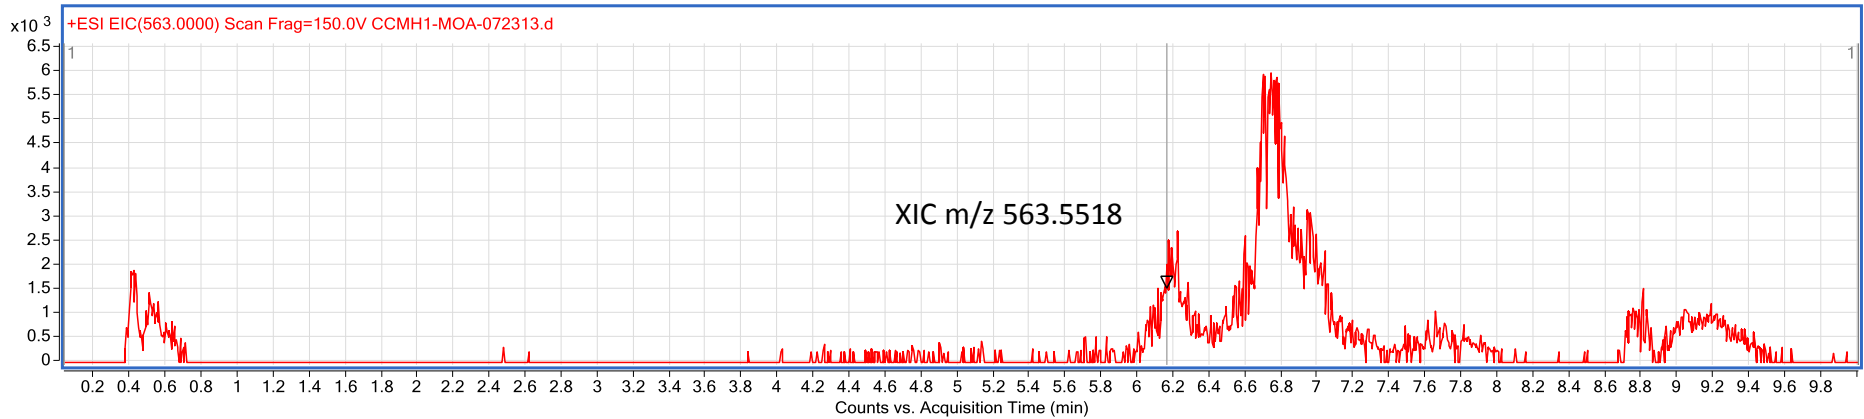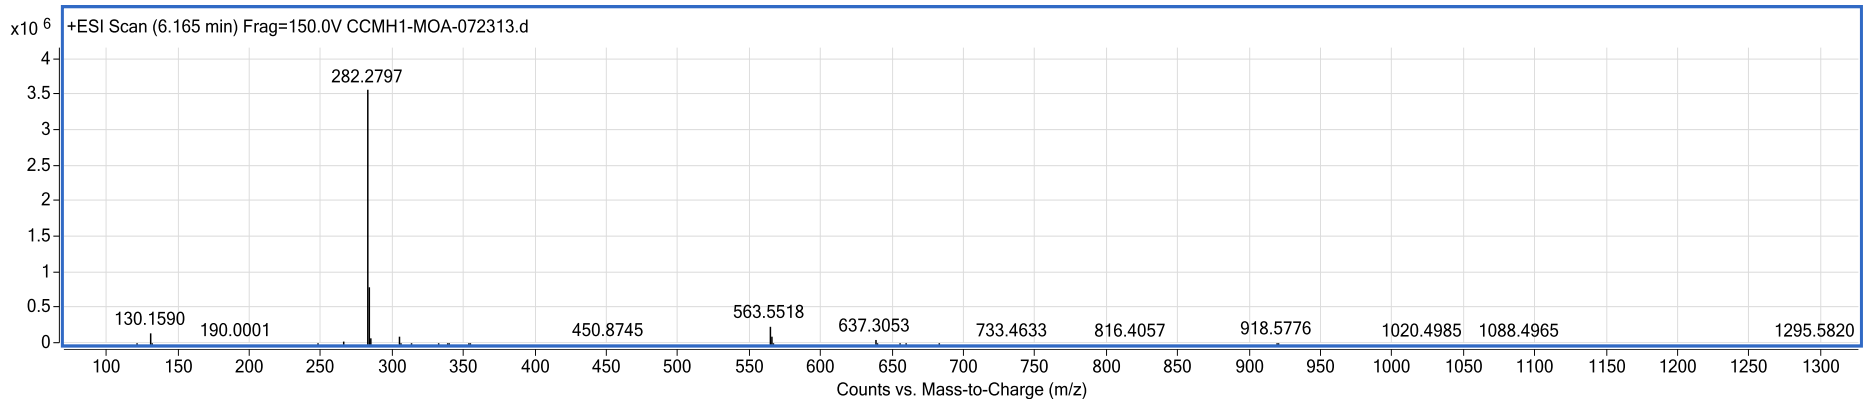



# Greater rhea (at 563)

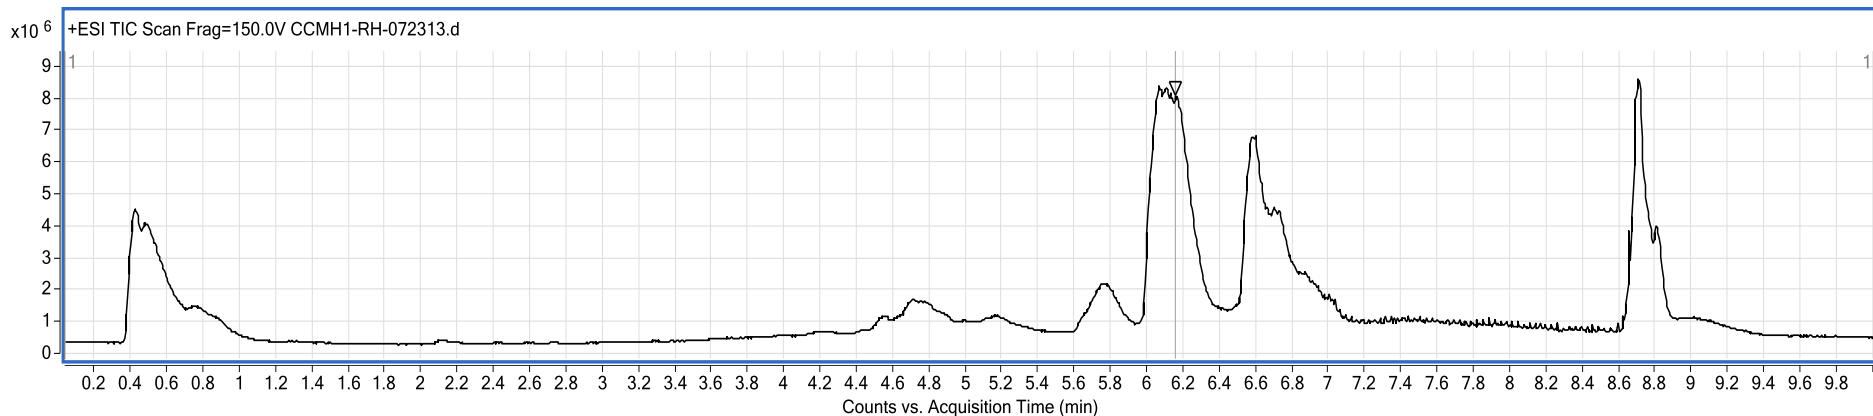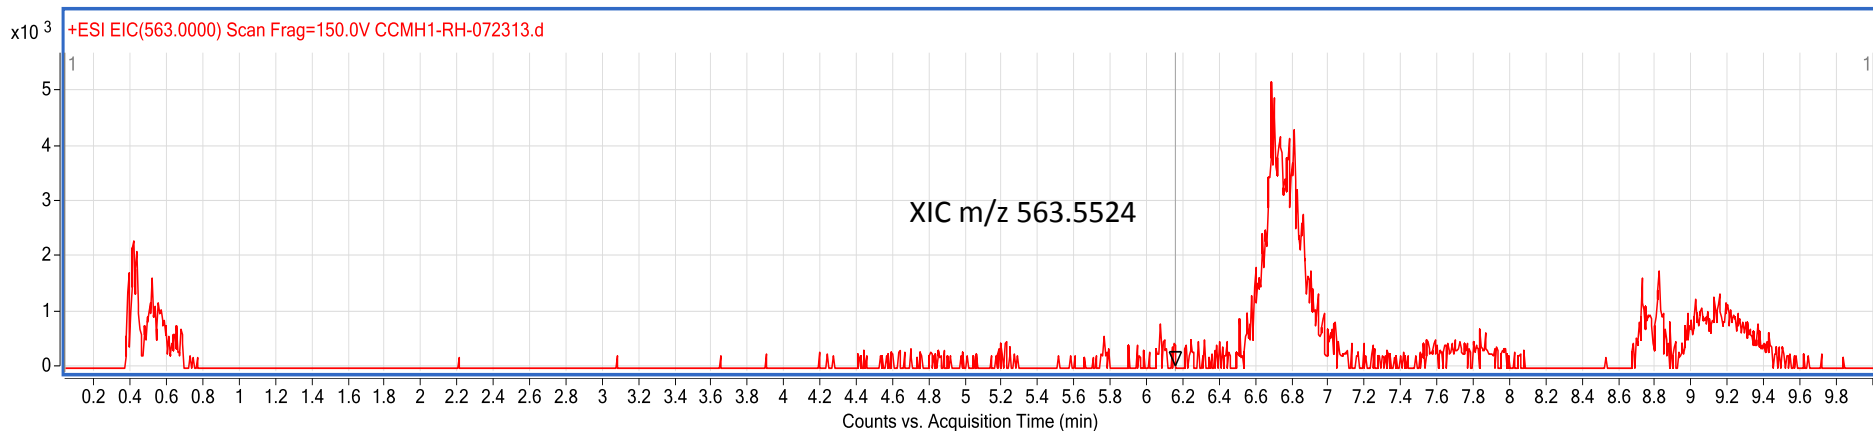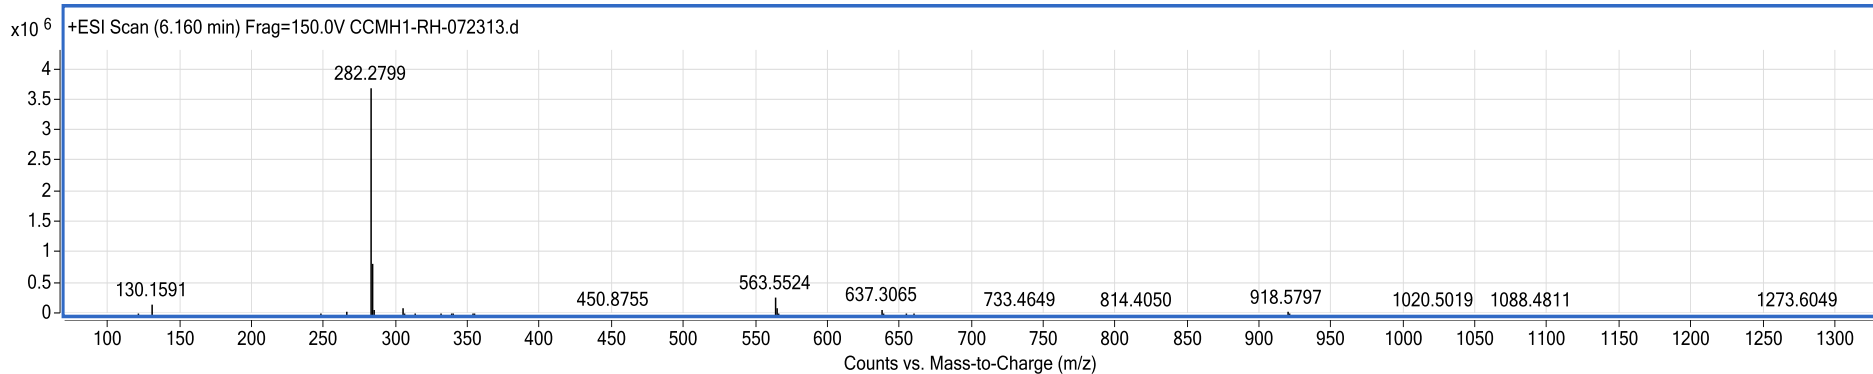

# Chilean tinamou (at 563)

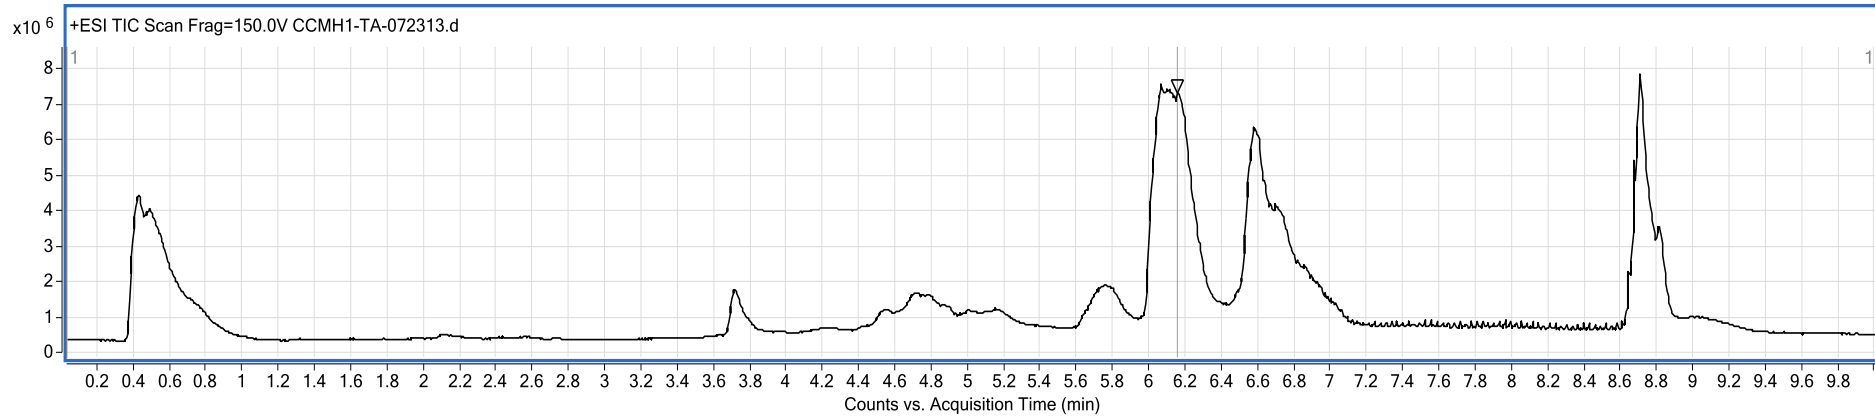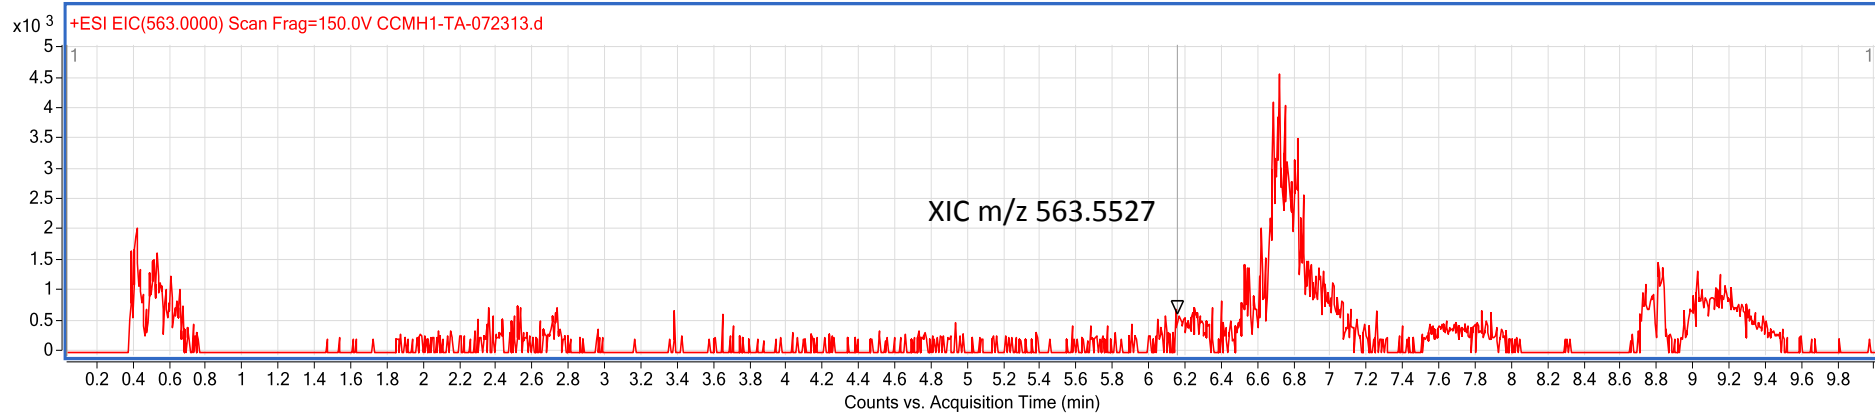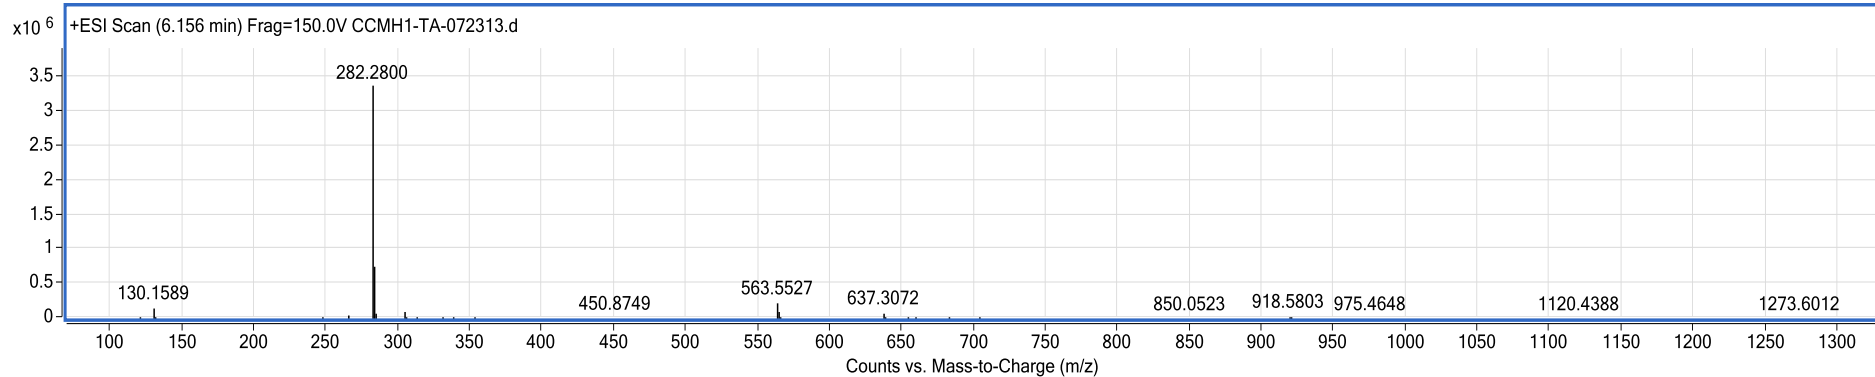

# Chilean tinamou (at 583)

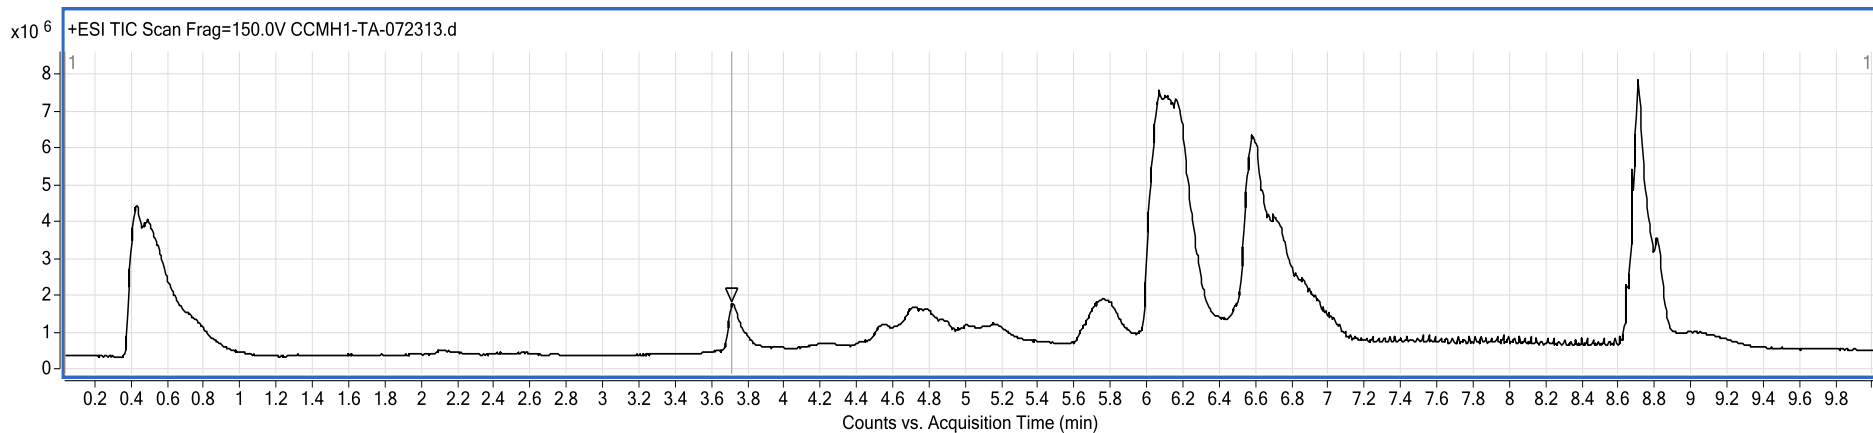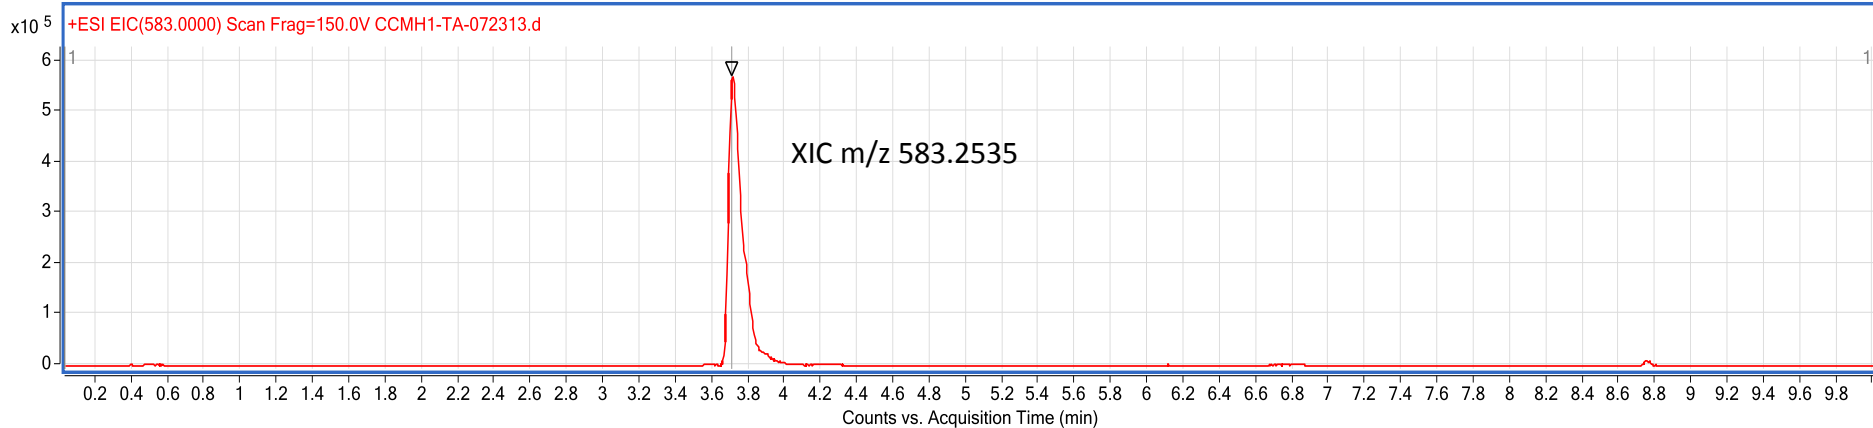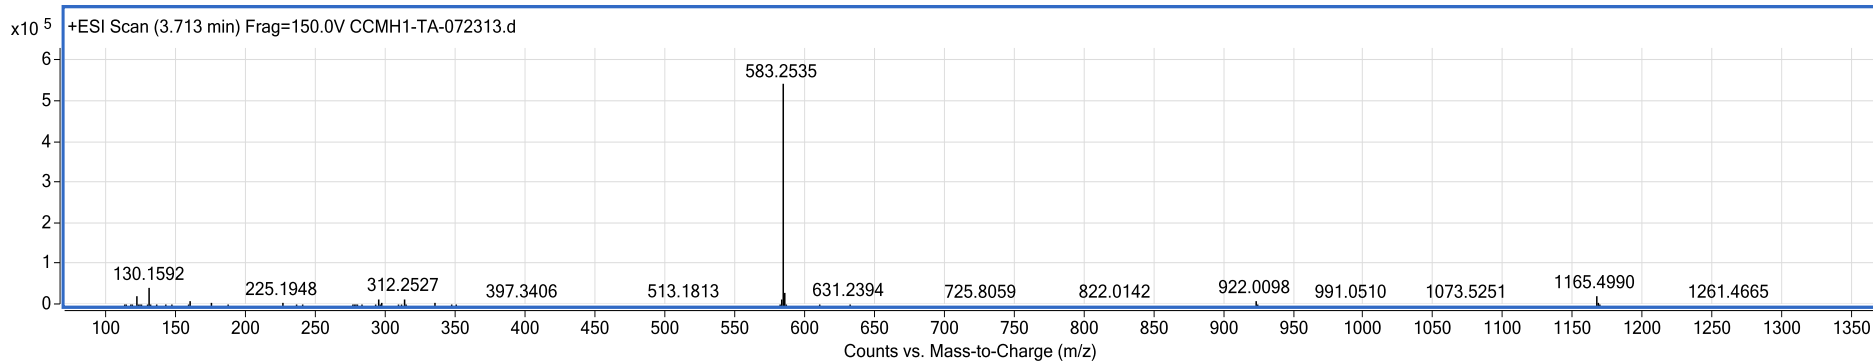

# Great tinamou (at 563)

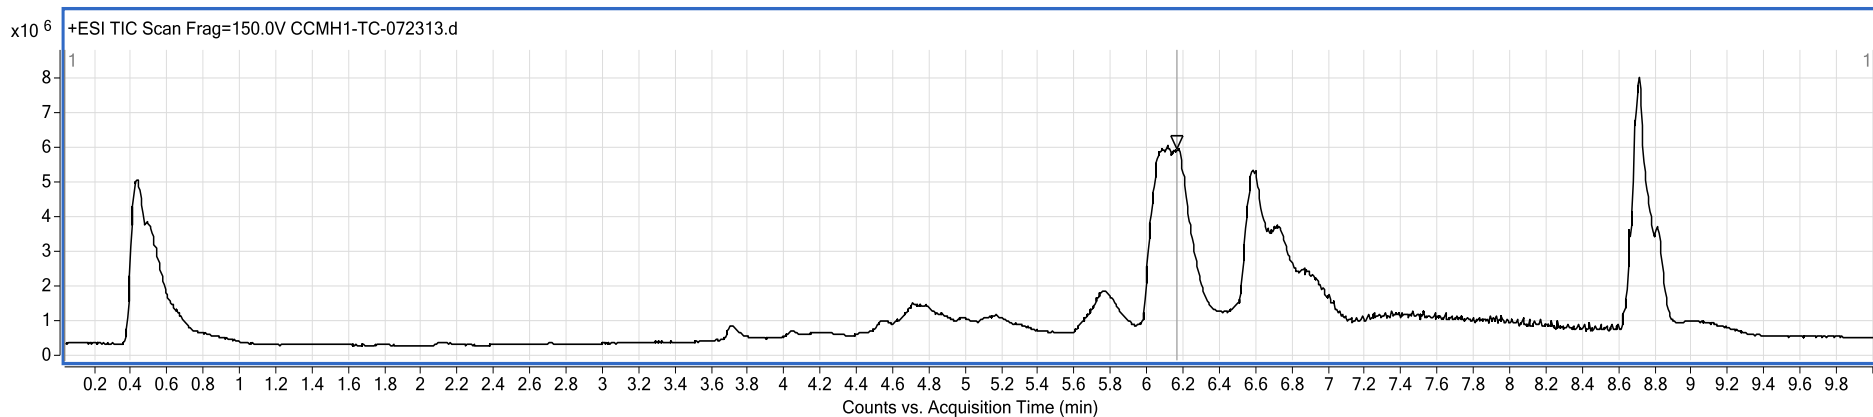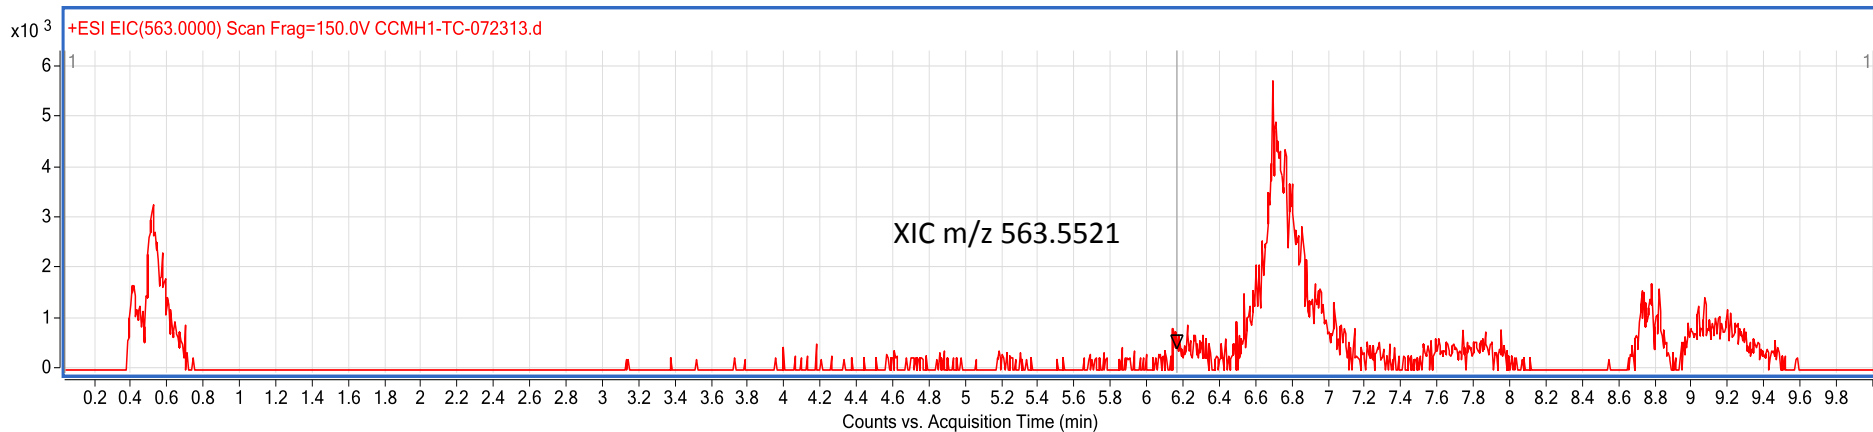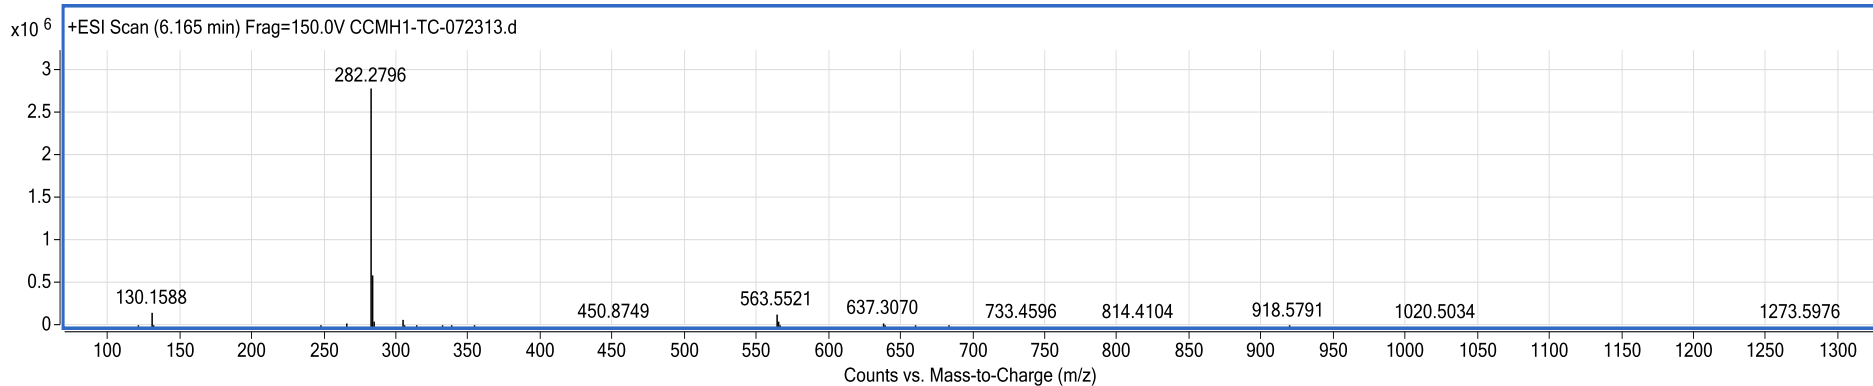

# Great tinamou (at 583)

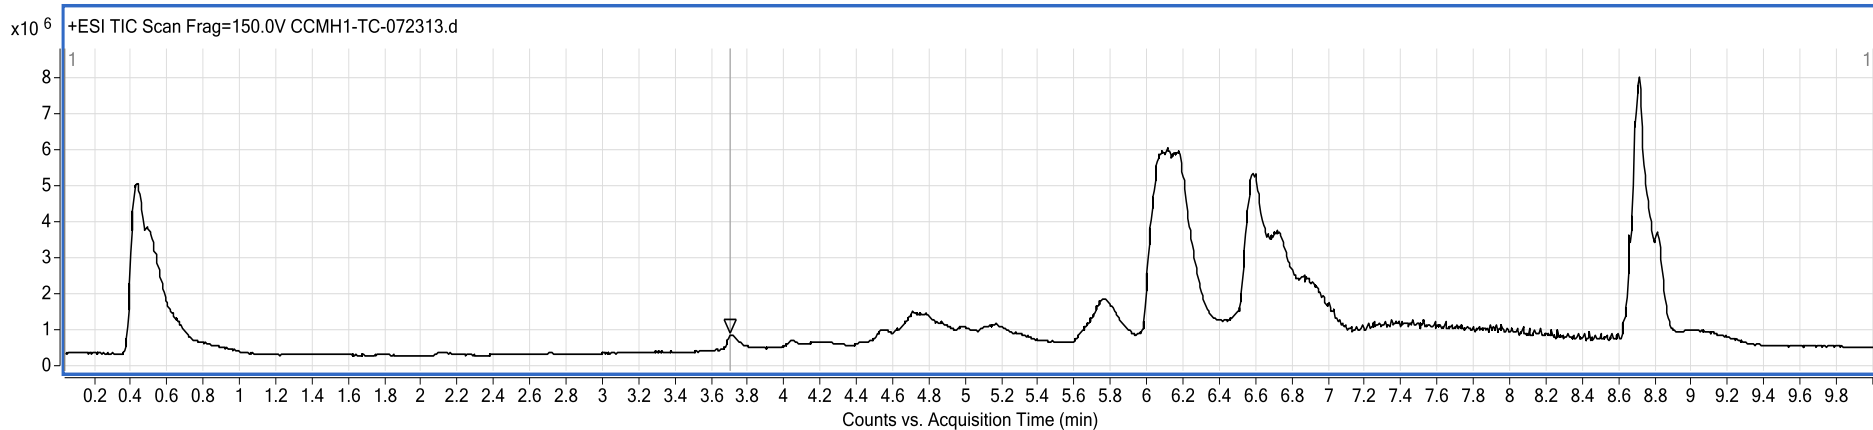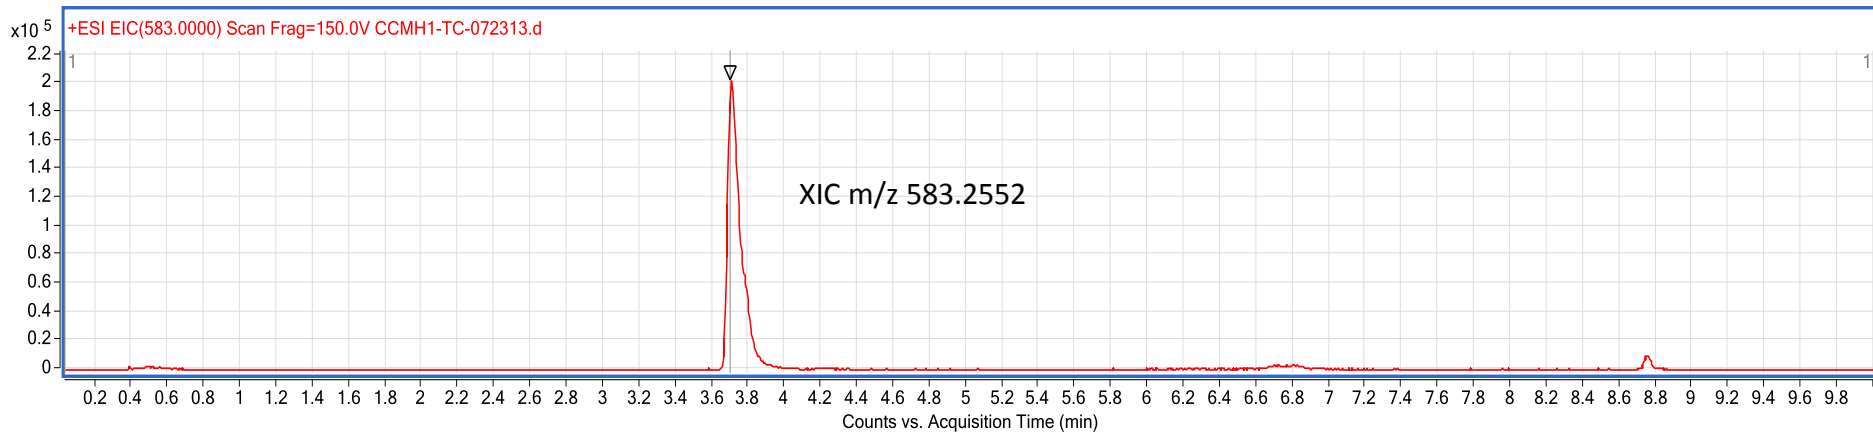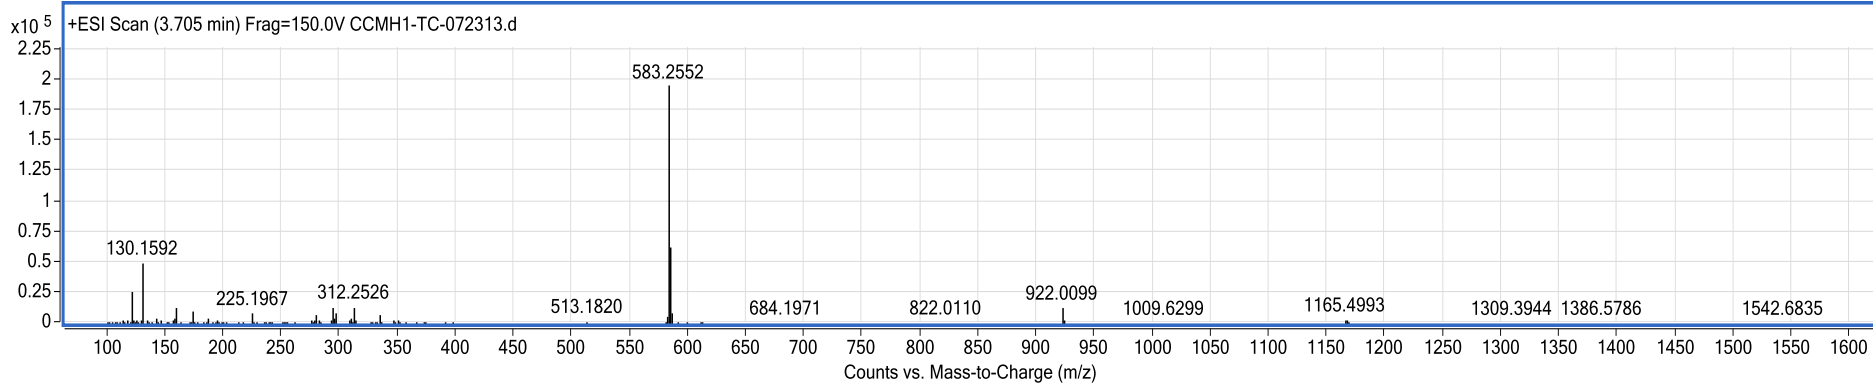

# Spotted Nothura (at 563)

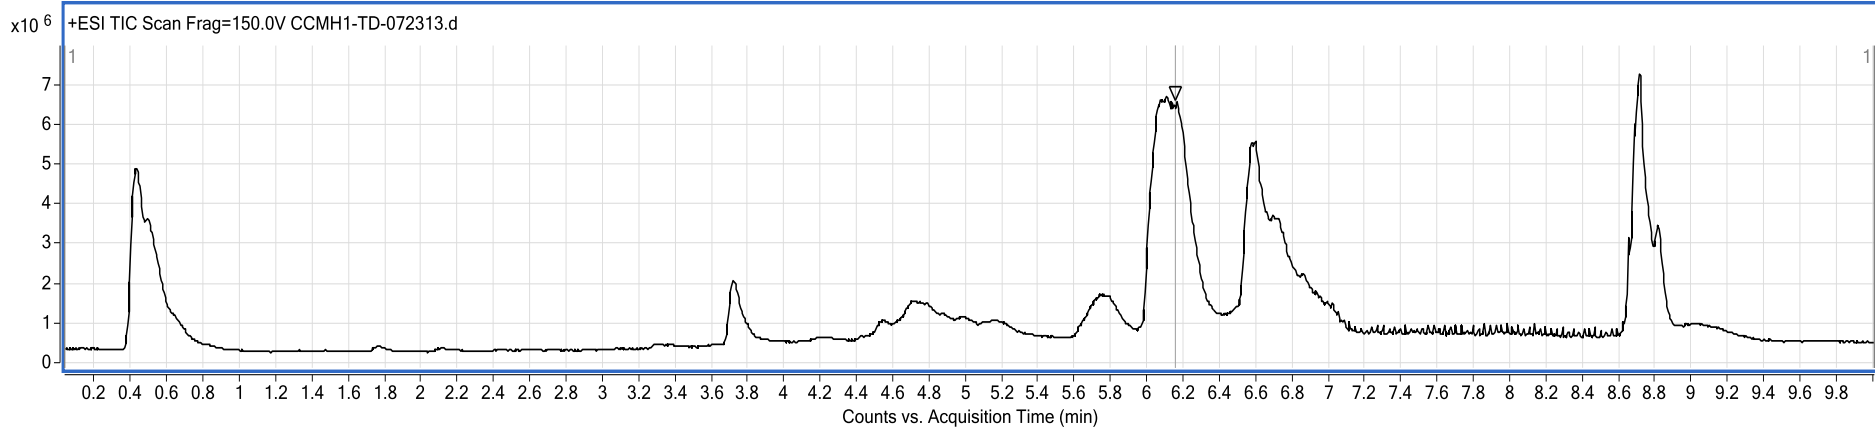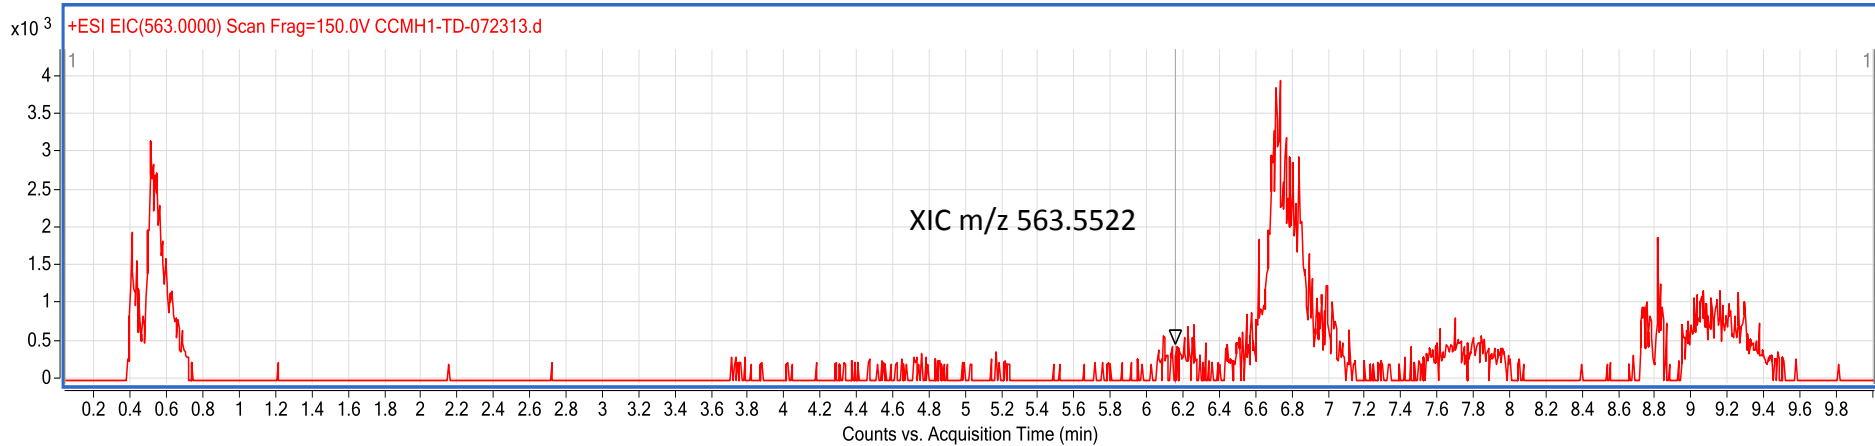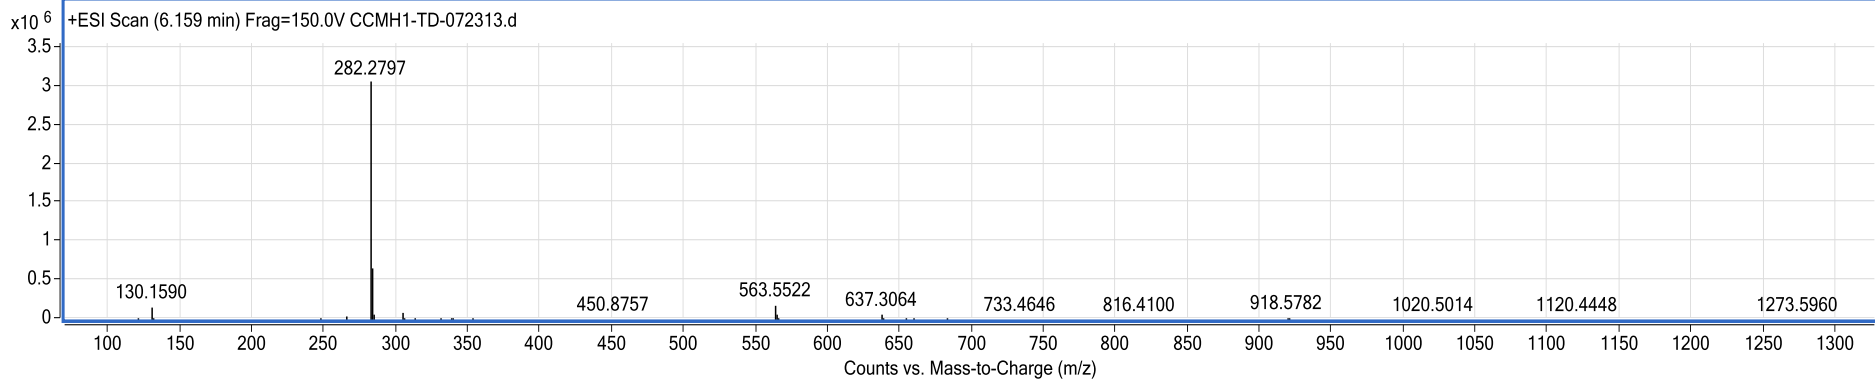

# Spotted Nothura (at 583)

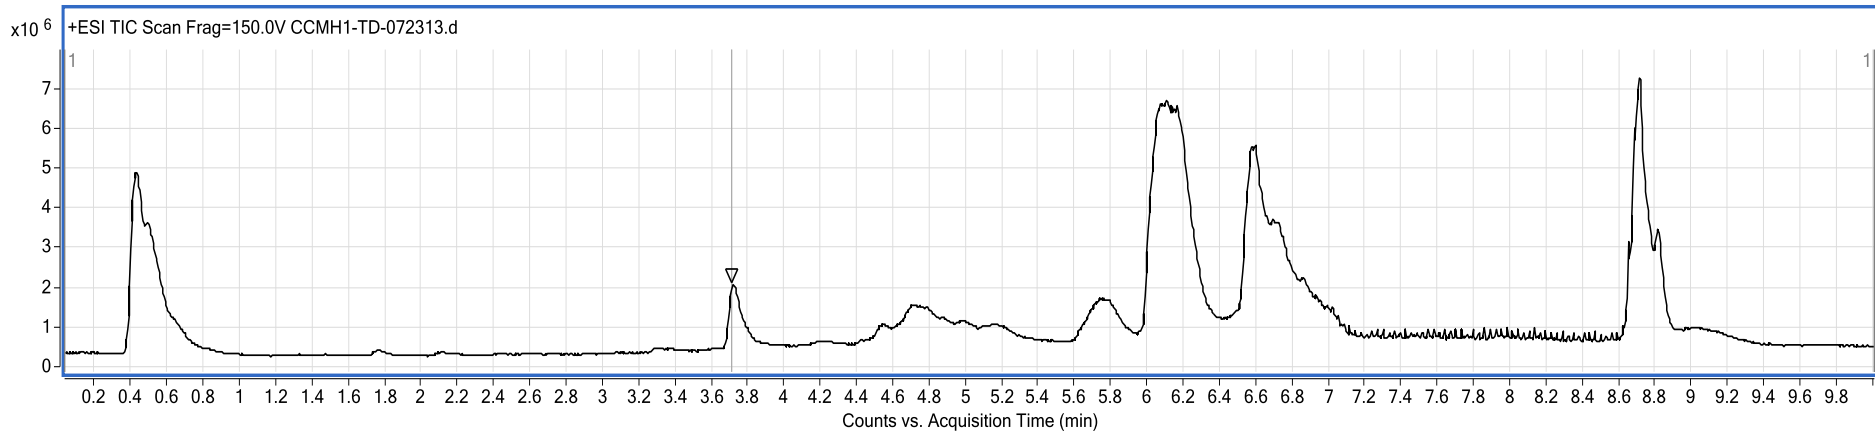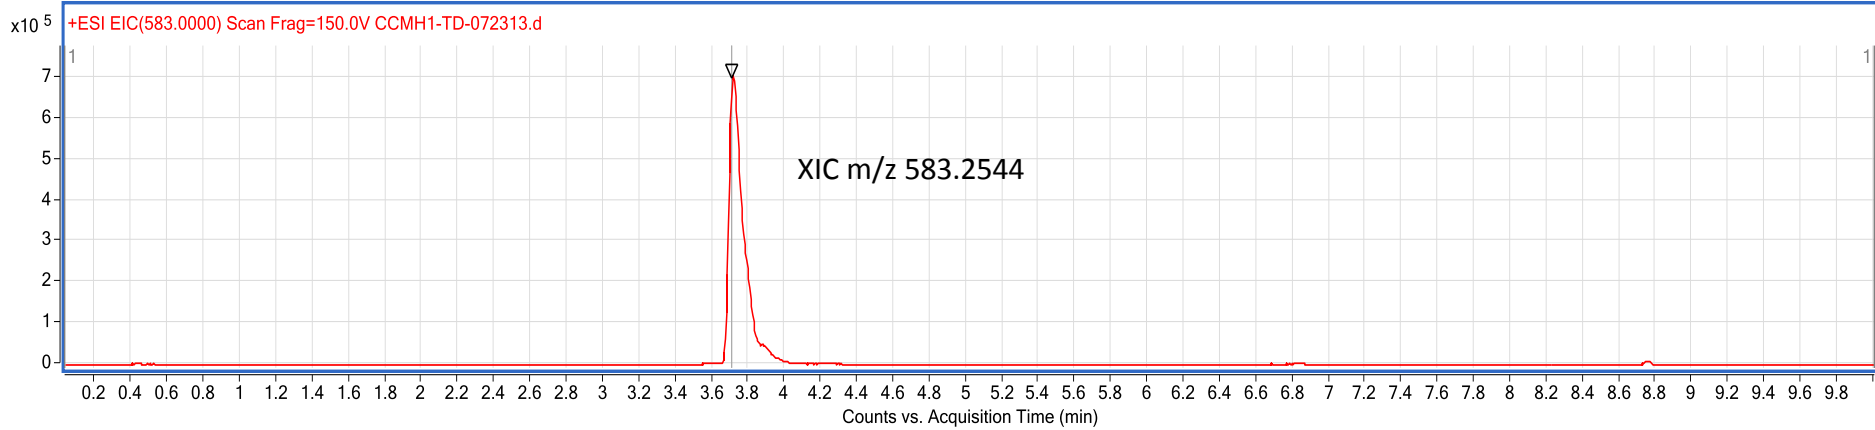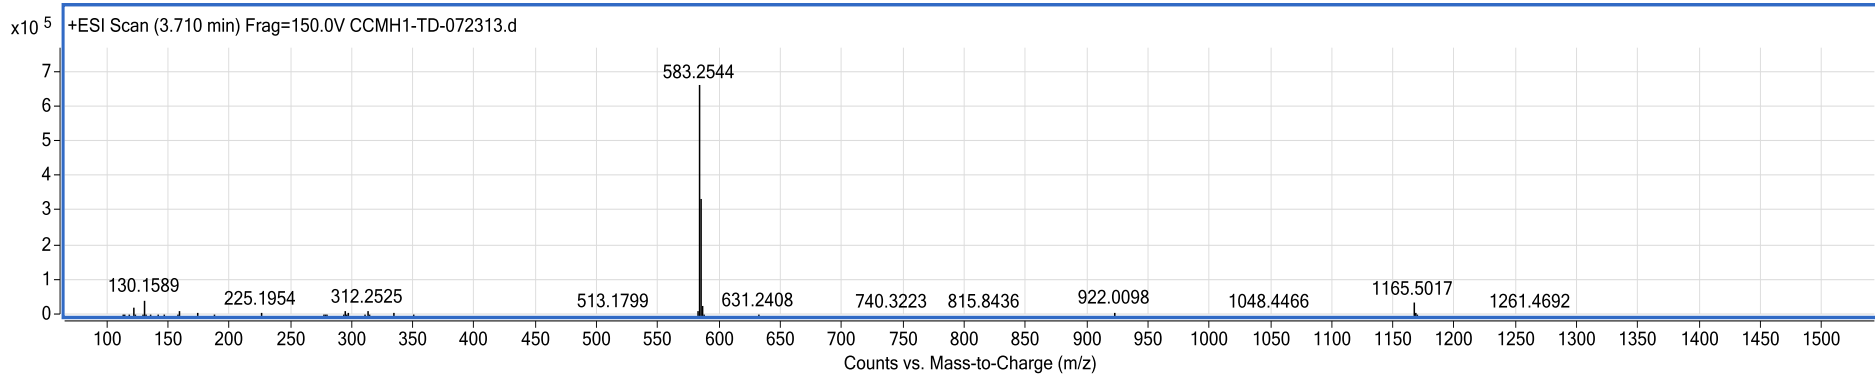

# Elegant crested tinamou (at 583)

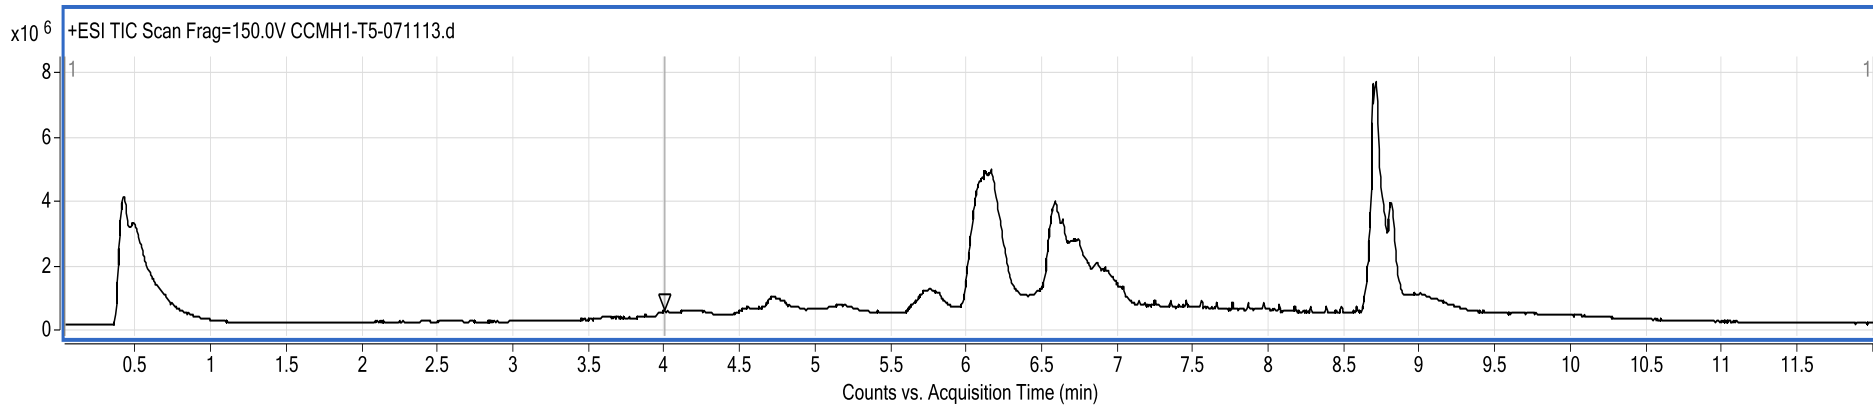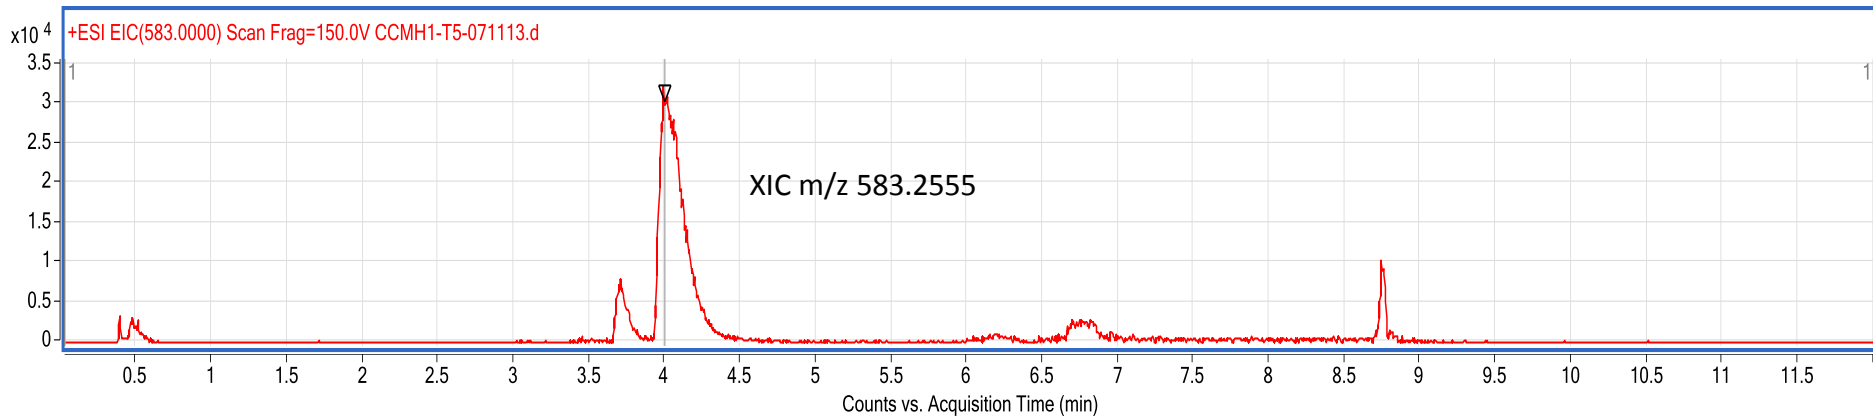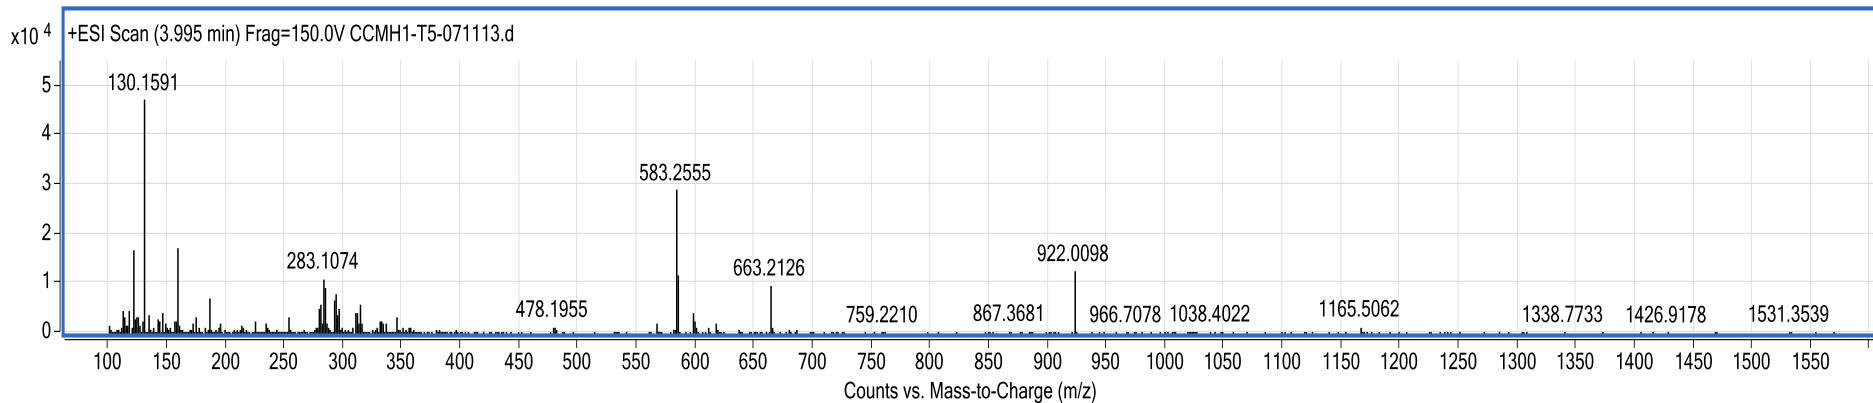



# Bivalve sp. (at 563)

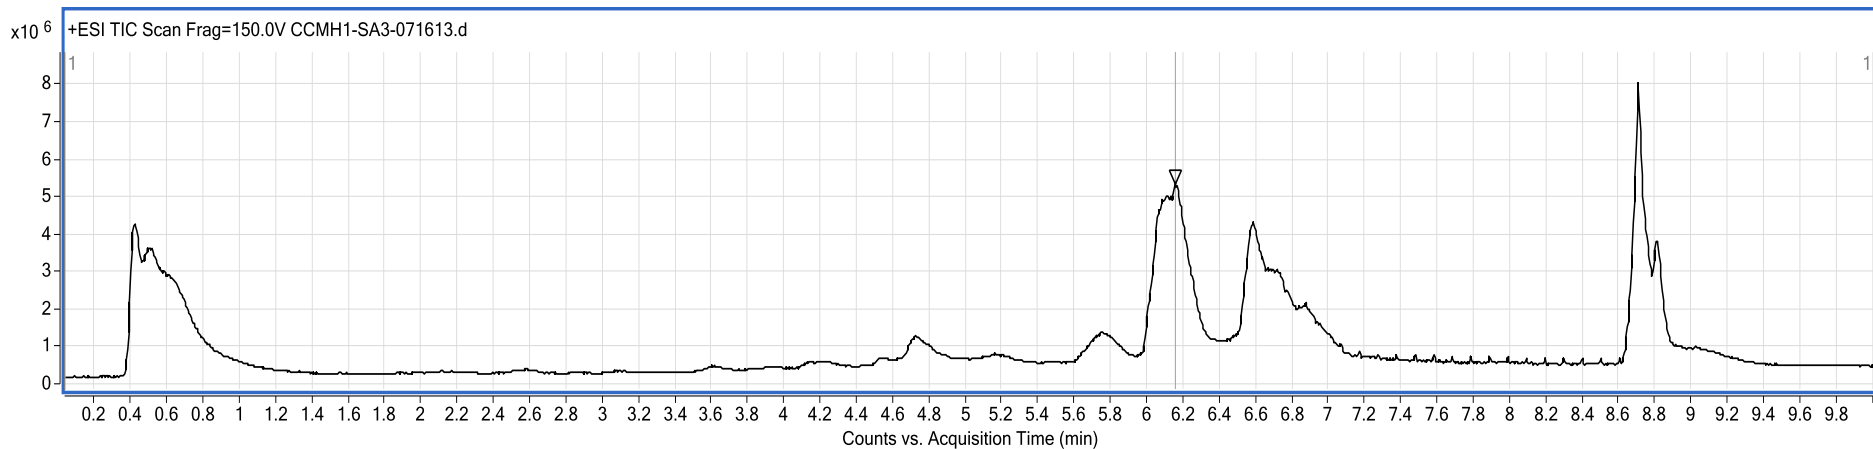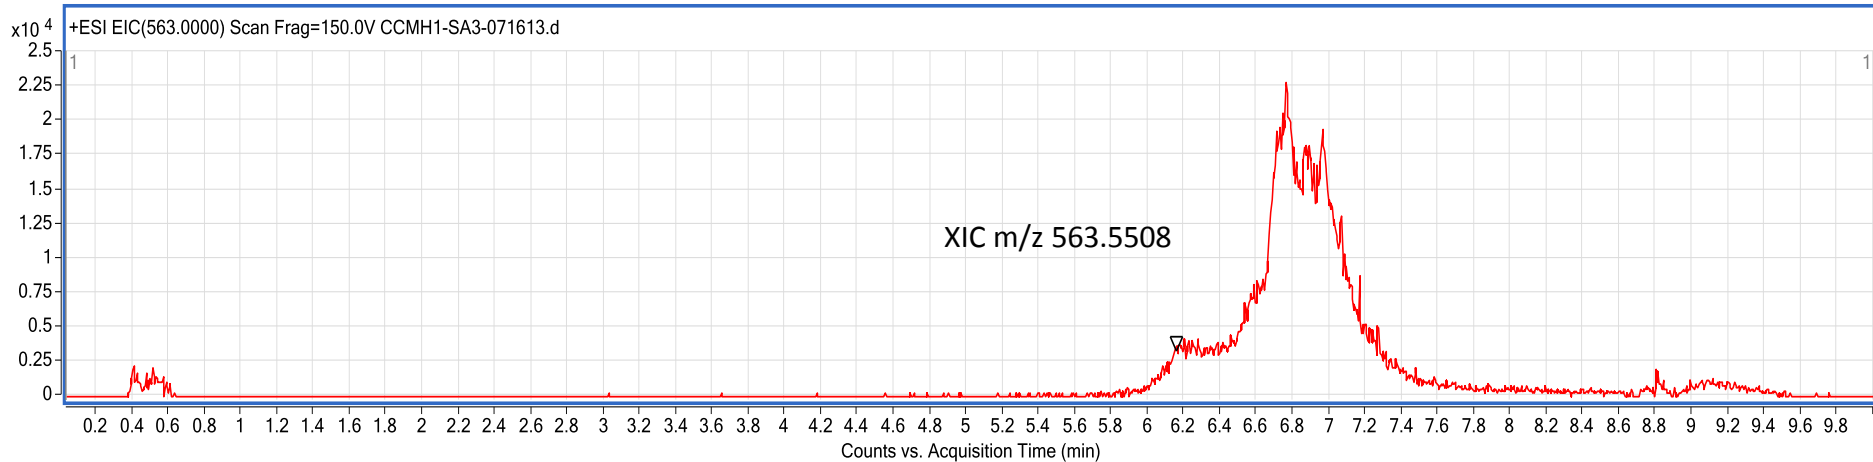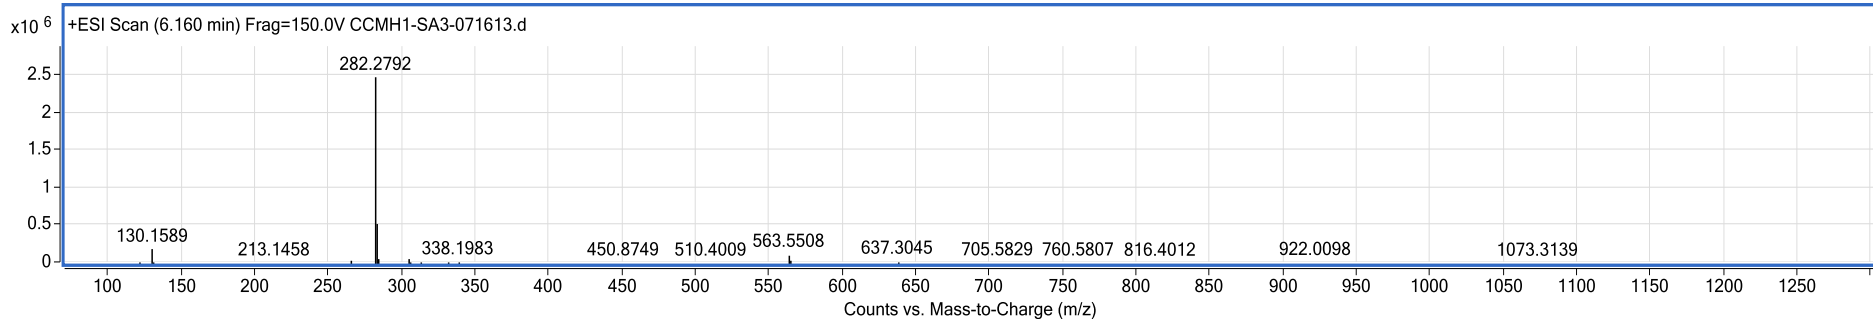

# Conus striatus (at 563)

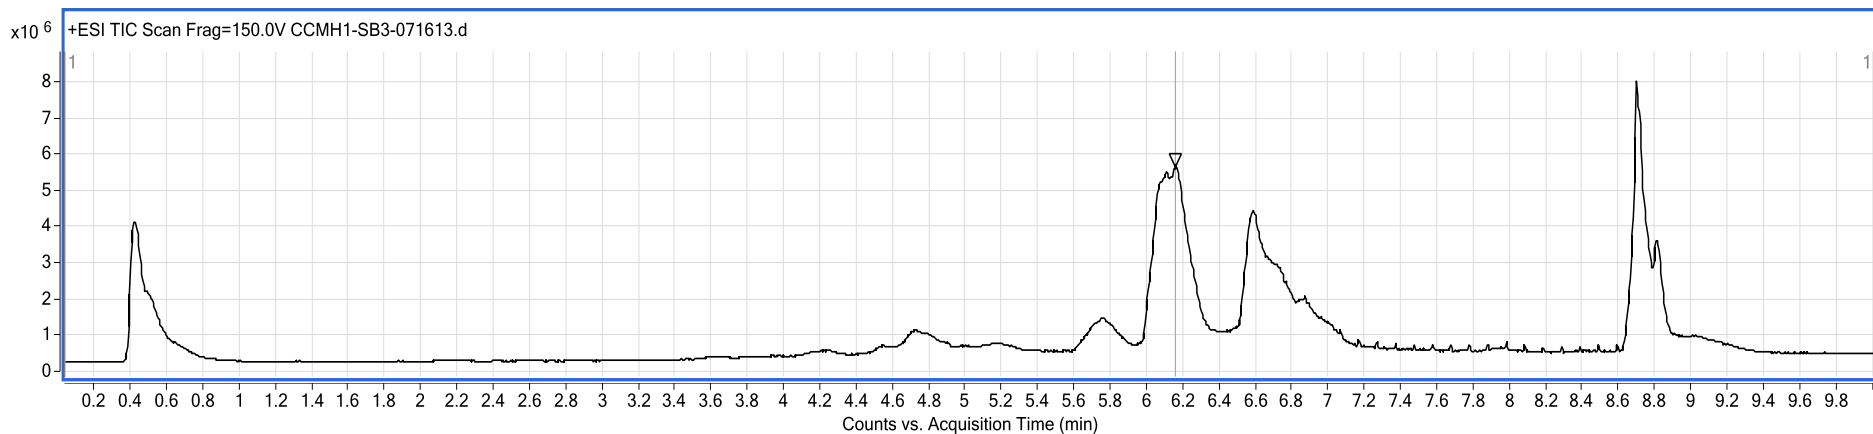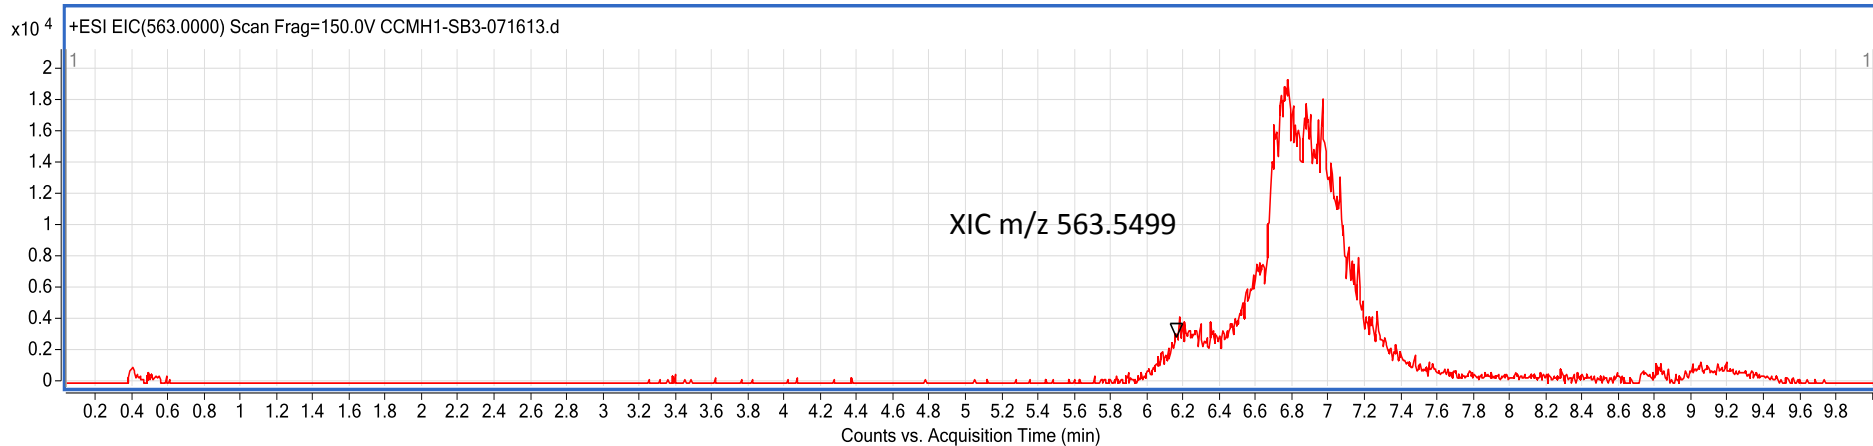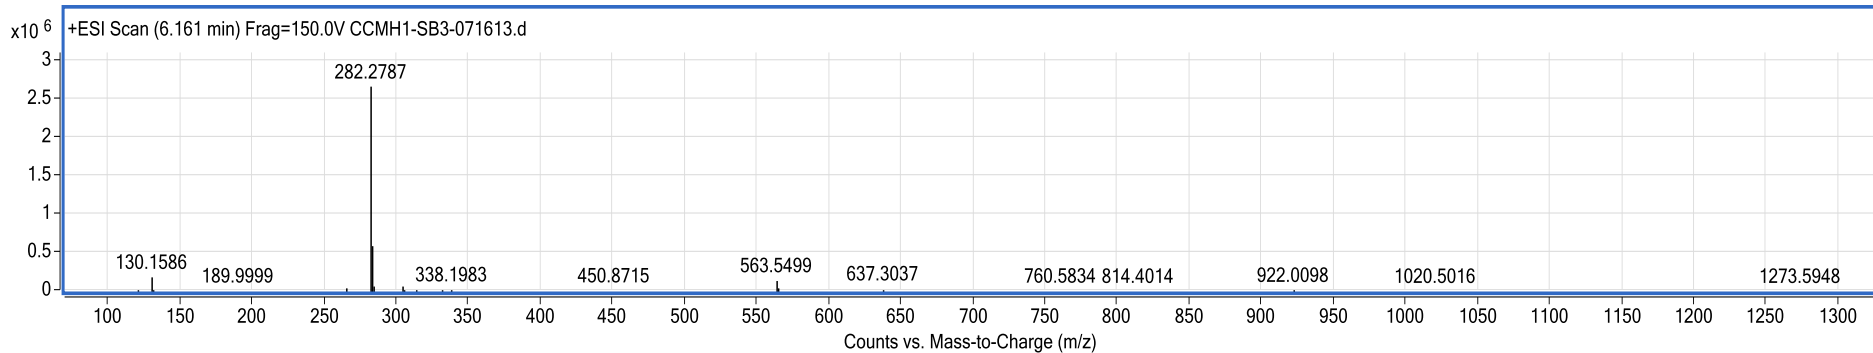

# *Hastula hectica* (at 563)

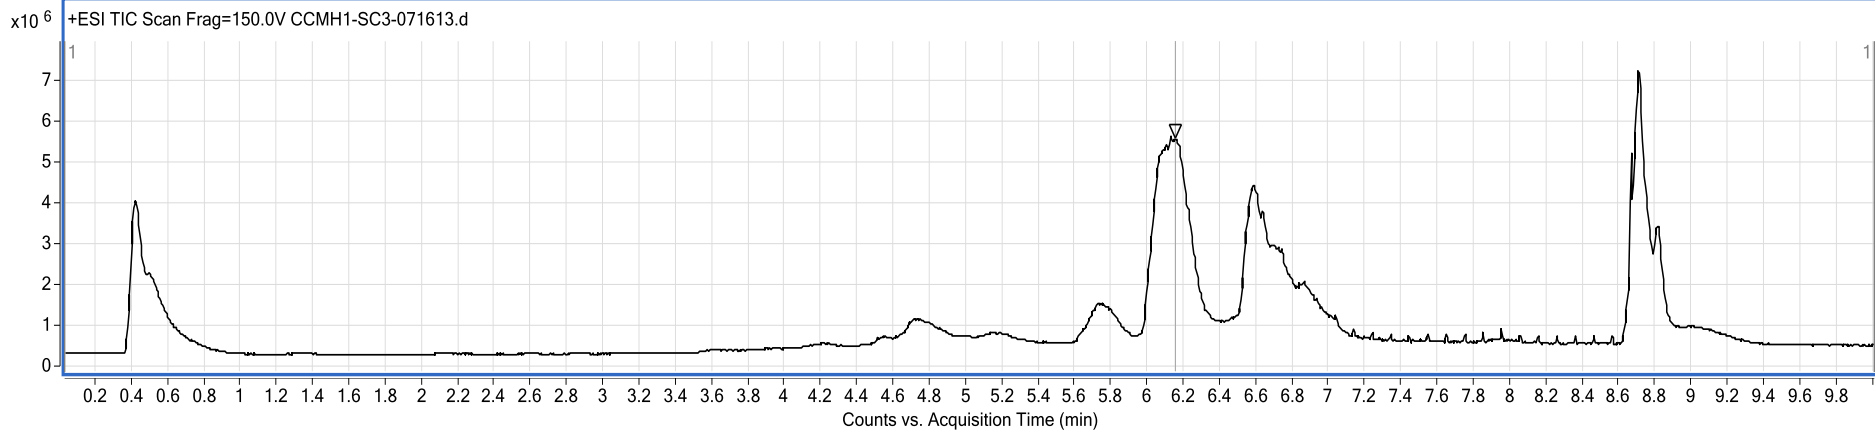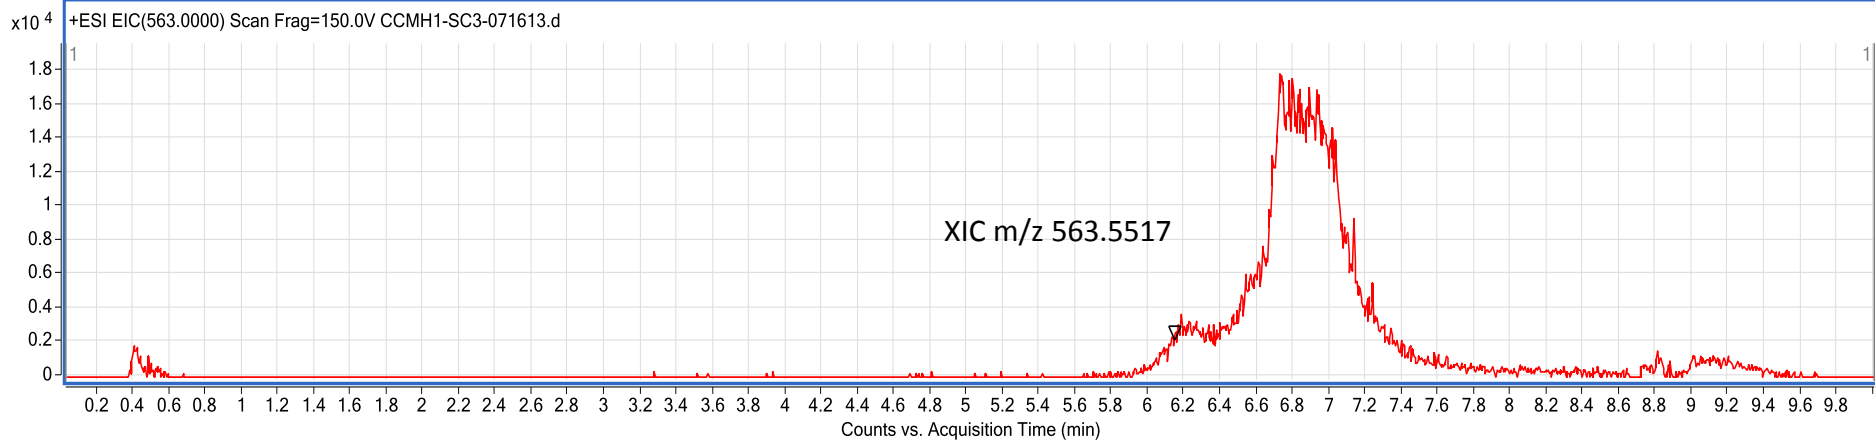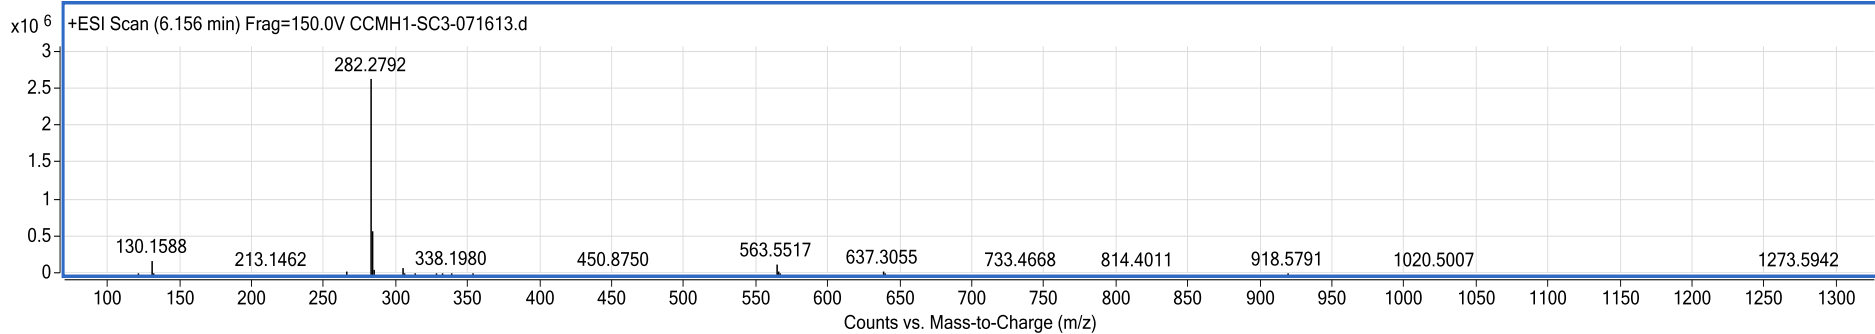

# *Conus ebraeus* (at 563)

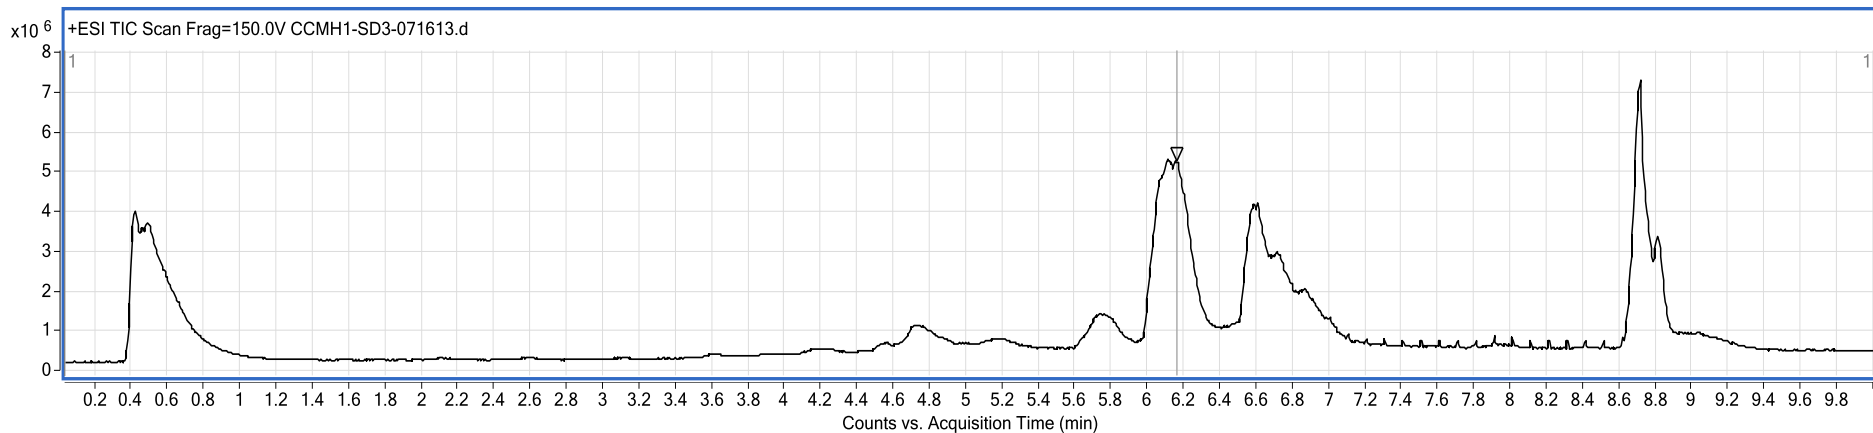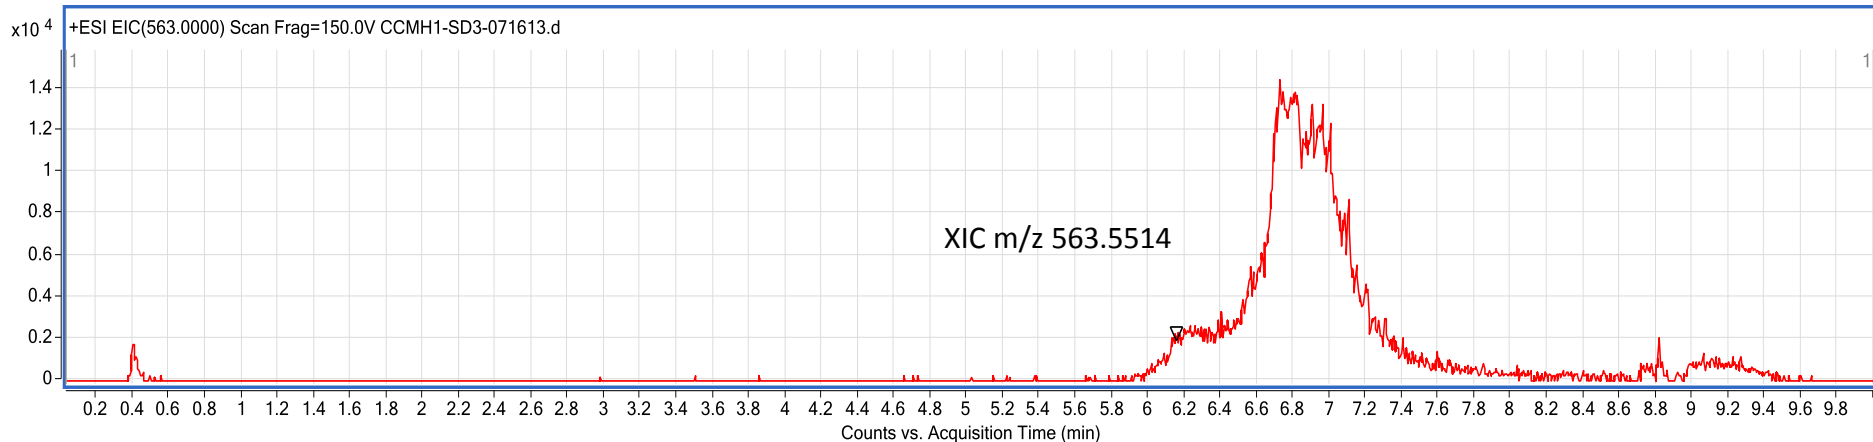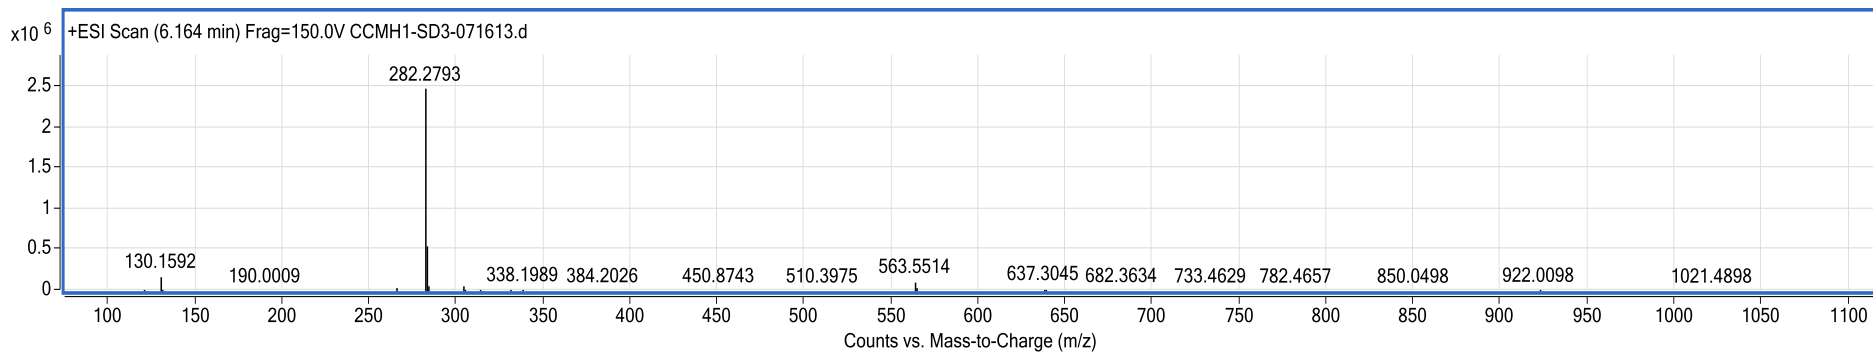

# Protoporphyrin IX acid standard

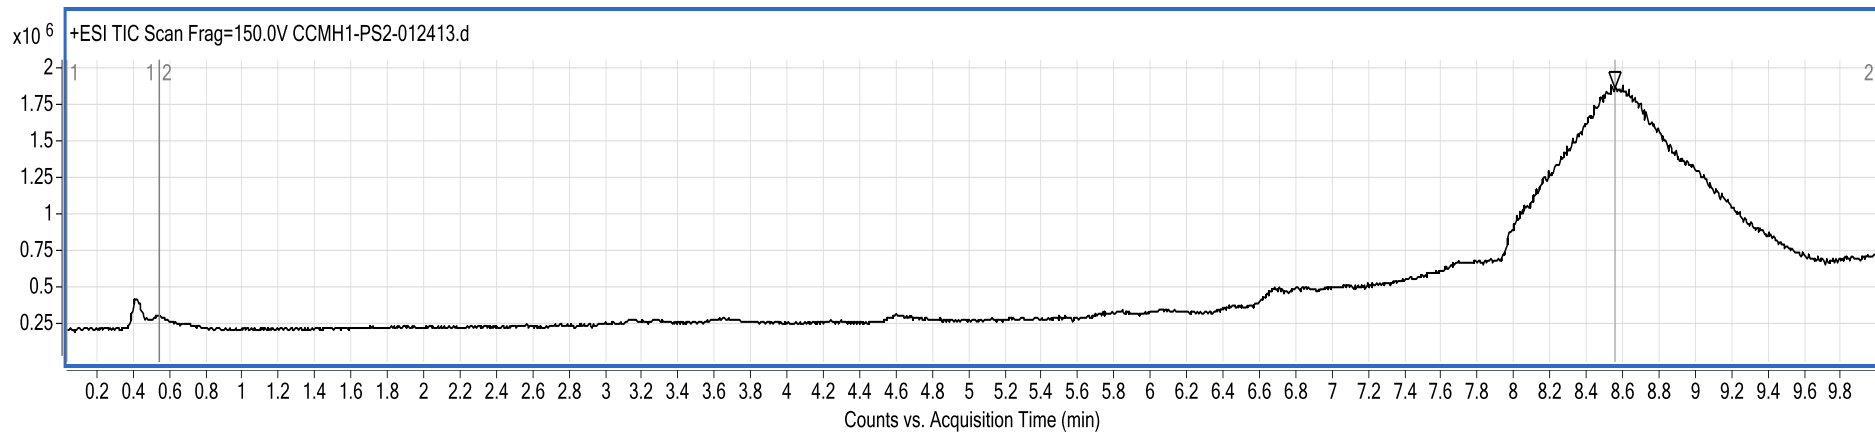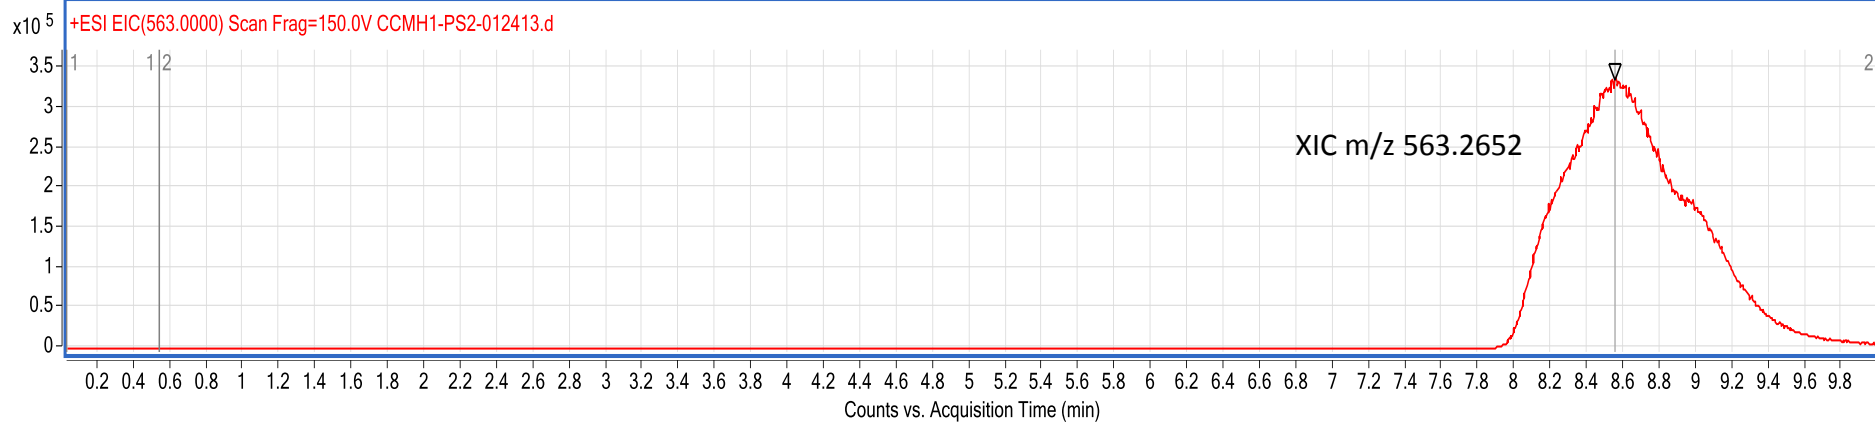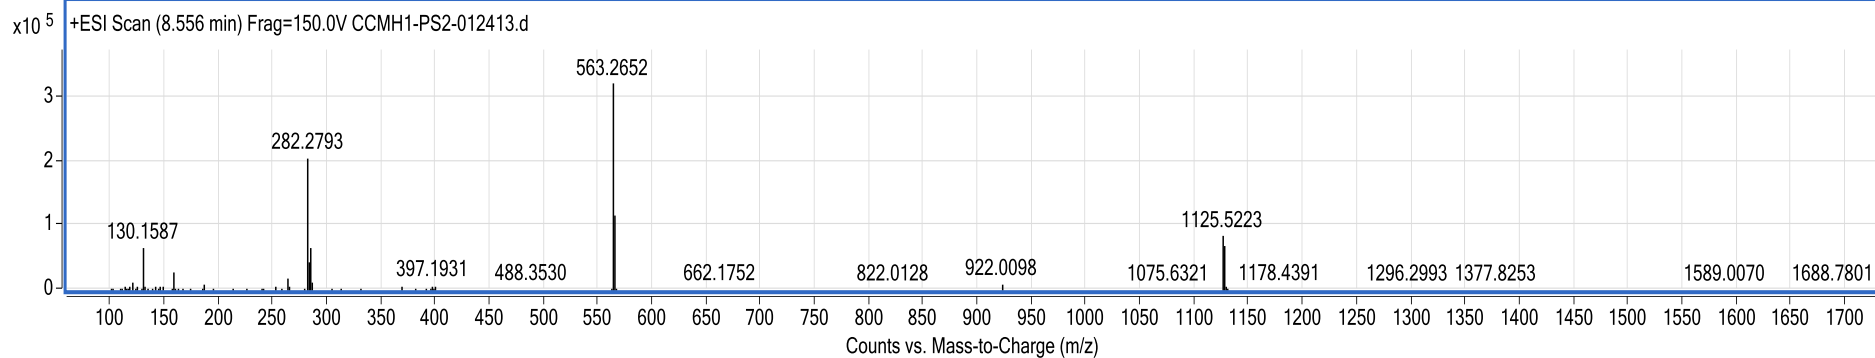

Supplement: pone.0143545.s001.pdf [file pone.0143545.s001.pdf]
