# Supplementary material for: Nature’s Palette: Characterization of Shared Pigments in Colorful Avian and Mollusk Shells
Source: PubMed Central journal article supplement (PMC4674117; doi:10.1371/journal.pone.0143545), 2015-12-09
Supplement: pone.0143545.s002.pdf [file pone.0143545.s002.pdf]

**S2 Table. Shell purchase/collection locations.**

| <b>Species</b>                    | <b>Location</b>                | <b>Source</b>                    |
|-----------------------------------|--------------------------------|----------------------------------|
| <i>Euryapteryx curtus</i>         | Tokerau Beach, New Zealand     | The Bone Room, Berkeley, CA, USA |
| <i>Aepyornis</i> sp.              | Madagascar (extinct)           | The Bone Room, Berkeley, CA, USA |
| <i>Dromaius novaehollandiae</i>   | Akatarawa, New Zealand         | Bluebank Blueberry and Emu Farm, |
| <i>Casuaris casuaris</i>          | Dallas, TX, USA                | The Eggery Place                 |
| <i>Rhea americana</i>             | Dallas, TX, USA                | The Eggery Place                 |
| <i>Struthio camelus</i>           | Dallas, TX, USA                | The Eggery Place                 |
| <i>Apteryx mantelli</i>           | Rotorua, New Zealand           | Rainbow Springs Kiwi House       |
| <i>Nothoprocta perdicaria</i>     | Dallas, TX, USA                | The Eggery Place                 |
| <i>Eudromia elegans</i>           | Bronx, NY, USA                 | Bronx Zoo                        |
| <i>Tinamus major</i>              | La Selva, Costa Rica           | Free-living bird's nest          |
| <i>Nothura maculosa</i>           | Dallas, TX, USA                | The Eggery Place                 |
| <i>Turdus migratorius</i>         | Ithaca, NY, USA                | Free-living bird's nest          |
| <i>Molothrus ater</i>             | Ithaca, NY, USA                | Free-living bird's nest          |
| <i>Coturnix japonica</i>          | Dallas, TX, USA                | The Eggery Place                 |
| <i>Gallus gallus</i>              | Dallas, TX, USA                | The Eggery Place                 |
| <i>Alligator mississippiensis</i> | Dallas, TX, USA                | The Eggery Place                 |
| <i>Hastula hectica</i>            | Las Perlas Archipelago, Panama | Collection by SCUBA              |
| <i>Conus purpurascens</i>         | Las Perlas Archipelago, Panama | Collection by SCUBA              |
| <i>Conus ebraeus</i>              | Okinawa, Japan                 | Collection by SCUBA              |
| <i>Agropecten</i> sp.             | Las Perlas Archipelago, Panama | Collection by SCUBA              |
